# Supplementary material for: Conjugation of the Ubiquitin Activating Enzyme UBE1 with the Ubiquitin-Like Modifier FAT10 Targets It for Proteasomal Degradation
Source: PLoS One. 2015 Mar 13;10(3):e0120329. doi: 10.1371/journal.pone.0120329 (PMC4359146; doi:10.1371/journal.pone.0120329)
Supplement: S1 Table — (DOCX) [file pone.0120329.s005.docx]

**S1 Table**. Mass spectrometry analysis of the endogenous UBE1-FAT10 conjugate.


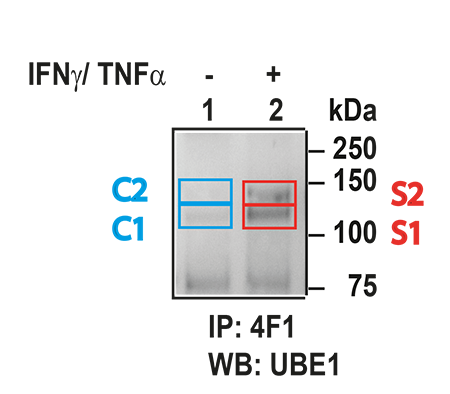


**Sample S1:**

| | Accession | | --- | | O43795 | | P53396 | | P42285 | | O95071 | | Q9P0K7 | | O00159 | | P09874 | | Q9BPX3 | | Q15029 | | Q6P1N0 | | P78347 | | P58107 | | Q15149 | | Q9Y2A7 | | Q15393 | | O95373 | | O00203 | | Q8TF46 | | Q16531 | | Q14152 | | Q99613 | | Q9H9Y6 | | Q86XI2 | | P33176 | | Q14527 | | O00410 | | P51530 | | O15205 | | Q12768 | | Q92974 | | Q99575 | | P15924 | | P22314 | | P0CG48 | | Q9BTW9 | | Q9BZH6 | | P98175 | | Q96DT7 | | O60231 | | Q9BSJ8 | | Q16513 | | P52701 | | Q8IWX8 | | Q8WUM0 | | O75400 | | Q05397 | | Q9BXP5 | | Q00839 | | Q02241 | | Q9HCE1 | | Q86XP3 | | Q5H9R7 | | P13639 | | P51610 | | P53992 | | Q9C0B7 | | Q86YS7 | | Q3KQU3 | | Q8IUD2 | | Q9UPP1 | | Q96P70 | | O75122 | | Q86W56 | | Q13813 | | Q9Y2D5 | | Q86VP6 | | Q08211 | | O15042 | | Q8N163 | | Q6VY07 | | O60518 | | Q8IWC1 | | O94832 | | Q9H0A0 | | P08670 | | Q8IVF7 | | P28340 | | O94972 | | Q7KZF4 | | Q69YQ0 | | Q9Y5B6 | | Q92900 | | Q8IXT5 | | O75694 | | Q86W92 | | Q9NZC9 | | Q9Y6K5 | | Q8WVB6 | | Q9NQW6 | | P43243 | | Q8TEX9 | | Q9NX05 | | P49756 | | Q9Y2L1 | | Q9Y4E8 | | P55884 | | Q96QU8 | | Q86UV5 | | P57740 | | Q8N960 | | Q6PKG0 | | Q9BQE3 | | P49792 | | P04350 | | P35749 | | Q14562 | | Q9H2U1 | | P38935 | | Q01082 | | Q93100 | | P12814 | | Q96T76 | | O00267 | | P05023 | | Q8TEW0 | | Q14679 | | A0AVT1 | | Q15386 | | P05141 | | O94906 | | Q5M775 | | P69849 | | P68104 | | O94762 | | Q12955 | | P30876 | |  | | | Coverage | | --- | | 23.77 | | 21.98 | | 18.04 | | 12.43 | | 28.47 | | 24.65 | | 12.43 | | 13.60 | | 21.71 | | 16.09 | | 17.43 | | 14.46 | | 4.29 | | 15.51 | | 9.61 | | 7.32 | | 17.18 | | 11.29 | | 16.67 | | 6.87 | | 9.97 | | 11.63 | | 9.36 | | 10.90 | | 6.44 | | 7.66 | | 7.36 | | 41.82 | | 6.64 | | 7.40 | | 7.23 | | 5.33 | | 11.44 | | 52.55 | | 5.29 | | 4.74 | | 6.77 | | 9.87 | | 7.88 | | 7.34 | | 8.54 | | 4.41 | | 8.52 | | 4.93 | | 4.60 | | 3.90 | | 4.11 | | 3.27 | | 5.94 | | 1.99 | | 6.29 | | 7.10 | | 7.46 | | 5.16 | | 4.66 | | 6.58 | | 5.50 | | 2.97 | | 2.87 | | 3.21 | | 4.51 | | 2.16 | | 6.25 | | 2.02 | | 6.05 | | 3.01 | | 2.60 | | 2.53 | | 6.72 | | 3.74 | | 3.53 | | 4.91 | | 5.57 | | 3.02 | | 10.09 | | 4.38 | | 3.97 | | 2.49 | | 2.86 | | 2.86 | | 3.82 | | 4.52 | | 3.50 | | 2.80 | | 3.86 | | 2.20 | | 2.02 | | 2.67 | | 3.47 | | 4.37 | | 4.44 | | 3.56 | | 3.68 | | 3.55 | | 2.96 | | 2.70 | | 1.96 | | 3.09 | | 2.16 | | 3.04 | | 3.56 | | 4.23 | | 0.78 | | 4.50 | | 0.86 | | 1.72 | | 3.57 | | 4.73 | | 0.68 | | 3.29 | | 2.91 | | 2.43 | | 2.12 | | 2.05 | | 1.47 | | 2.17 | | 2.28 | | 1.85 | | 7.05 | | 2.02 | | 1.97 | | 2.37 | | 4.11 | | 2.32 | | 0.46 | | 1.79 | |  | | | # PSMs | | --- | | 64 | | 45 | | 42 | | 57 | | 44 | | 41 | | 28 | | 21 | | 34 | | 23 | | 25 | | 21 | | 29 | | 22 | | 18 | | 12 | | 24 | | 22 | | 26 | | 17 | | 13 | | 16 | | 15 | | 19 | | 9 | | 12 | | 12 | | 13 | | 10 | | 13 | | 12 | | 19 | | 15 | | 21 | | 9 | | 11 | | 10 | | 9 | | 14 | | 10 | | 11 | | 8 | | 9 | | 8 | | 8 | | 9 | | 5 | | 5 | | 7 | | 6 | | 8 | | 10 | | 8 | | 13 | | 5 | | 7 | | 7 | | 4 | | 4 | | 6 | | 5 | | 4 | | 10 | | 8 | | 6 | | 5 | | 5 | | 4 | | 8 | | 5 | | 10 | | 7 | | 10 | | 5 | | 7 | | 8 | | 5 | | 4 | | 4 | | 5 | | 5 | | 8 | | 5 | | 5 | | 6 | | 3 | | 4 | | 4 | | 5 | | 5 | | 5 | | 4 | | 5 | | 6 | | 6 | | 4 | | 4 | | 4 | | 4 | | 3 | | 5 | | 4 | | 2 | | 2 | | 4 | | 3 | | 5 | | 5 | | 3 | | 5 | | 2 | | 3 | | 3 | | 3 | | 3 | | 2 | | 3 | | 3 | | 2 | | 2 | | 3 | | 2 | | 2 | | 2 | | 2 | | 2 | |  | | | # Peptides | | --- | | 23 | | 18 | | 15 | | 25 | | 21 | | 20 | | 10 | | 10 | | 16 | | 11 | | 13 | | 8 | | 16 | | 13 | | 9 | | 6 | | 15 | | 10 | | 14 | | 8 | | 7 | | 10 | | 9 | | 9 | | 5 | | 6 | | 7 | | 5 | | 6 | | 6 | | 6 | | 13 | | 8 | | 4 | | 5 | | 5 | | 5 | | 6 | | 7 | | 6 | | 6 | | 5 | | 6 | | 4 | | 3 | | 4 | | 3 | | 2 | | 4 | | 2 | | 5 | | 5 | | 5 | | 7 | | 3 | | 5 | | 4 | | 2 | | 3 | | 3 | | 4 | | 2 | | 5 | | 4 | | 3 | | 3 | | 3 | | 2 | | 5 | | 3 | | 3 | | 4 | | 5 | | 3 | | 4 | | 4 | | 4 | | 2 | | 2 | | 3 | | 3 | | 5 | | 3 | | 3 | | 3 | | 2 | | 2 | | 2 | | 3 | | 3 | | 4 | | 3 | | 3 | | 3 | | 3 | | 2 | | 2 | | 3 | | 2 | | 3 | | 3 | | 2 | | 2 | | 2 | | 2 | | 2 | | 3 | | 4 | | 2 | | 3 | | 2 | | 2 | | 2 | | 2 | | 2 | | 2 | | 2 | | 2 | | 2 | | 2 | | 2 | | 2 | | 2 | | 2 | | 2 | | 2 | |  | | | # AAs | | --- | | 1136 | | 1101 | | 1042 | | 2799 | | 980 | | 1063 | | 1014 | | 1015 | | 972 | | 951 | | 998 | | 5090 | | 4684 | | 1128 | | 1217 | | 1038 | | 1094 | | 1054 | | 1140 | | 1382 | | 913 | | 1135 | | 1143 | | 963 | | 1009 | | 1097 | | 1060 | | 165 | | 1159 | | 986 | | 1024 | | 2871 | | 1058 | | 685 | | 1192 | | 1224 | | 930 | | 871 | | 1041 | | 1104 | | 984 | | 1360 | | 916 | | 1156 | | 957 | | 1052 | | 876 | | 825 | | 960 | | 1003 | | 938 | | 873 | | 858 | | 2035 | | 1094 | | 1094 | | 1000 | | 841 | | 1116 | | 1060 | | 1041 | | 1294 | | 976 | | 2472 | | 859 | | 1230 | | 1270 | | 1029 | | 923 | | 963 | | 1105 | | 876 | | 1006 | | 1025 | | 466 | | 1028 | | 1107 | | 964 | | 910 | | 1117 | | 917 | | 1129 | | 1001 | | 1391 | | 1011 | | 954 | | 1087 | | 975 | | 1124 | | 847 | | 1081 | | 1096 | | 843 | | 958 | | 981 | | 814 | | 1125 | | 1035 | | 925 | | 986 | | 1096 | | 449 | | 3224 | | 444 | | 1972 | | 1220 | | 1008 | | 993 | | 2364 | | 1093 | | 892 | | 1030 | | 1087 | | 1023 | | 1356 | | 1199 | | 1052 | | 1083 | | 298 | | 941 | | 1068 | | 1222 | | 462 | | 991 | | 4377 | | 1174 | |  | | | MW [kDa] | | --- | | 131.9 | | 120.8 | | 117.7 | | 309.2 | | 110.0 | | 121.6 | | 113.0 | | 114.3 | | 109.4 | | 104.0 | | 112.3 | | 555.3 | | 531.5 | | 128.7 | | 135.5 | | 119.4 | | 121.2 | | 120.7 | | 126.9 | | 166.5 | | 105.3 | | 128.1 | | 130.9 | | 109.6 | | 113.9 | | 123.5 | | 120.3 | | 18.5 | | 134.2 | | 111.5 | | 114.6 | | 331.6 | | 117.8 | | 77.0 | | 132.5 | | 136.6 | | 103.5 | | 94.8 | | 119.2 | | 122.8 | | 112.0 | | 152.7 | | 103.6 | | 128.9 | | 108.7 | | 119.2 | | 100.6 | | 90.5 | | 110.0 | | 113.6 | | 102.9 | | 97.6 | | 95.3 | | 208.6 | | 118.2 | | 120.7 | | 110.4 | | 92.8 | | 128.0 | | 117.8 | | 115.9 | | 141.0 | | 111.0 | | 284.4 | | 94.6 | | 136.3 | | 140.9 | | 118.2 | | 102.8 | | 104.8 | | 124.6 | | 98.4 | | 116.1 | | 115.7 | | 53.6 | | 117.1 | | 123.6 | | 107.8 | | 101.9 | | 124.5 | | 104.7 | | 124.3 | | 118.0 | | 155.1 | | 114.0 | | 105.9 | | 121.1 | | 107.3 | | 124.1 | | 94.6 | | 118.6 | | 120.5 | | 100.1 | | 108.9 | | 112.3 | | 92.4 | | 128.8 | | 119.0 | | 106.3 | | 112.6 | | 123.4 | | 49.9 | | 358.0 | | 49.6 | | 227.2 | | 139.2 | | 114.7 | | 109.1 | | 274.4 | | 124.8 | | 103.0 | | 113.2 | | 120.9 | | 112.8 | | 151.3 | | 133.3 | | 117.9 | | 123.8 | | 32.8 | | 106.9 | | 118.5 | | 134.0 | | 50.1 | | 108.8 | | 480.1 | | 133.8 | |  | | | calc. pI | | --- | | 9.38 | | 7.33 | | 6.52 | | 5.85 | | 6.21 | | 9.41 | | 8.88 | | 5.59 | | 5.00 | | 8.09 | | 6.39 | | 5.60 | | 5.96 | | 6.62 | | 5.26 | | 4.82 | | 6.04 | | 6.54 | | 5.26 | | 6.79 | | 5.68 | | 7.83 | | 6.87 | | 6.51 | | 8.60 | | 4.94 | | 7.74 | | 8.90 | | 6.98 | | 7.27 | | 9.22 | | 6.81 | | 5.76 | | 7.66 | | 6.19 | | 6.92 | | 5.97 | | 5.16 | | 6.80 | | 5.83 | | 6.30 | | 6.90 | | 9.04 | | 5.10 | | 7.56 | | 6.62 | | 5.96 | | 6.00 | | 8.51 | | 8.82 | | 7.02 | | 4.60 | | 6.83 | | 7.46 | | 7.06 | | 6.11 | | 5.69 | | 10.11 | | 5.97 | | 8.72 | | 4.81 | | 8.47 | | 6.43 | | 5.35 | | 5.11 | | 5.78 | | 6.84 | | 8.47 | | 5.22 | | 7.74 | | 5.01 | | 9.32 | | 9.39 | | 8.27 | | 5.12 | | 6.65 | | 7.03 | | 5.15 | | 7.17 | | 5.72 | | 5.68 | | 6.61 | | 6.81 | | 6.16 | | 5.55 | | 9.06 | | 8.40 | | 7.21 | | 8.07 | | 6.25 | | 4.96 | | 9.03 | | 6.32 | | 7.14 | | 5.22 | | 5.00 | | 6.35 | | 6.05 | | 5.43 | | 6.25 | | 8.82 | | 5.10 | | 6.20 | | 4.88 | | 5.50 | | 8.32 | | 7.68 | | 8.97 | | 5.57 | | 6.95 | | 5.41 | | 6.35 | | 5.06 | | 5.49 | | 7.68 | | 8.85 | | 6.14 | | 6.71 | | 9.69 | | 8.25 | | 6.70 | | 5.67 | | 9.01 | | 8.56 | | 6.49 | | 6.87 | |  | | | Score | | --- | | 1286.82 | | 1138.11 | | 1026.28 | | 981.85 | | 851.59 | | 811.84 | | 770.05 | | 729.45 | | 673.96 | | 557.29 | | 501.96 | | 477.45 | | 456.70 | | 451.38 | | 434.35 | | 413.31 | | 402.54 | | 358.89 | | 352.58 | | 342.85 | | 338.75 | | 338.44 | | 314.83 | | 309.35 | | 277.86 | | 273.31 | | 271.22 | | 268.86 | | 256.31 | | 242.54 | | 239.03 | | 224.13 | | 223.40 | | 214.14 | | 206.69 | | 192.42 | | 185.98 | | 182.57 | | 179.36 | | 178.81 | | 176.58 | | 175.35 | | 175.18 | | 171.68 | | 166.69 | | 154.86 | | 153.80 | | 151.30 | | 151.26 | | 138.74 | | 138.67 | | 136.02 | | 135.62 | | 134.97 | | 132.44 | | 131.03 | | 128.77 | | 127.92 | | 127.11 | | 126.26 | | 121.58 | | 121.00 | | 120.18 | | 117.81 | | 115.64 | | 115.57 | | 113.61 | | 112.79 | | 111.00 | | 106.84 | | 105.82 | | 105.17 | | 104.74 | | 103.08 | | 101.49 | | 100.96 | | 100.73 | | 100.21 | | 98.85 | | 96.07 | | 95.81 | | 92.31 | | 92.01 | | 91.55 | | 89.01 | | 82.81 | | 80.58 | | 77.71 | | 76.64 | | 75.53 | | 69.74 | | 68.32 | | 66.97 | | 66.94 | | 66.81 | | 66.07 | | 63.27 | | 60.63 | | 60.53 | | 57.24 | | 54.69 | | 54.32 | | 53.39 | | 51.48 | | 50.79 | | 49.71 | | 49.37 | | 46.28 | | 44.63 | | 43.43 | | 42.62 | | 39.60 | | 38.36 | | 37.55 | | 37.20 | | 36.72 | | 36.18 | | 35.58 | | 34.05 | | 32.73 | | 28.91 | | 28.07 | | 26.28 | | 25.25 | | 21.89 | | 19.68 | |  | | | Description | | --- | | Unconventional myosin-Ib OS=Homo sapiens GN=MYO1B PE=2 SV=3 - [MYO1B_HUMAN] | | ATP-citrate synthase OS=Homo sapiens GN=ACLY PE=1 SV=3 - [ACLY_HUMAN] | | Superkiller viralicidic activity 2-like 2 OS=Homo sapiens GN=SKIV2L2 PE=1 SV=3 - [SK2L2_HUMAN] | | E3 ubiquitin-protein ligase UBR5 OS=Homo sapiens GN=UBR5 PE=1 SV=2 - [UBR5_HUMAN] | | Ankycorbin OS=Homo sapiens GN=RAI14 PE=1 SV=2 - [RAI14_HUMAN] | | Unconventional myosin-Ic OS=Homo sapiens GN=MYO1C PE=1 SV=4 - [MYO1C_HUMAN] | | Poly [ADP-ribose] polymerase 1 OS=Homo sapiens GN=PARP1 PE=1 SV=4 - [PARP1_HUMAN] | | Condensin complex subunit 3 OS=Homo sapiens GN=NCAPG PE=1 SV=1 - [CND3_HUMAN] | | 116 kDa U5 small nuclear ribonucleoprotein component OS=Homo sapiens GN=EFTUD2 PE=1 SV=1 - [U5S1_HUMAN] | | Coiled-coil and C2 domain-containing protein 1A OS=Homo sapiens GN=CC2D1A PE=1 SV=1 - [C2D1A_HUMAN] | | General transcription factor II-I OS=Homo sapiens GN=GTF2I PE=1 SV=2 - [GTF2I_HUMAN] | | Epiplakin OS=Homo sapiens GN=EPPK1 PE=1 SV=2 - [EPIPL_HUMAN] | | Plectin OS=Homo sapiens GN=PLEC PE=1 SV=3 - [PLEC_HUMAN] | | Nck-associated protein 1 OS=Homo sapiens GN=NCKAP1 PE=1 SV=1 - [NCKP1_HUMAN] | | Splicing factor 3B subunit 3 OS=Homo sapiens GN=SF3B3 PE=1 SV=4 - [SF3B3_HUMAN] | | Importin-7 OS=Homo sapiens GN=IPO7 PE=1 SV=1 - [IPO7_HUMAN] | | AP-3 complex subunit beta-1 OS=Homo sapiens GN=AP3B1 PE=1 SV=3 - [AP3B1_HUMAN] | | DIS3-like exonuclease 1 OS=Homo sapiens GN=DIS3L PE=1 SV=2 - [DI3L1_HUMAN] | | DNA damage-binding protein 1 OS=Homo sapiens GN=DDB1 PE=1 SV=1 - [DDB1_HUMAN] | | Eukaryotic translation initiation factor 3 subunit A OS=Homo sapiens GN=EIF3A PE=1 SV=1 - [EIF3A_HUMAN] | | Eukaryotic translation initiation factor 3 subunit C OS=Homo sapiens GN=EIF3C PE=1 SV=1 - [EIF3C_HUMAN] | | DNA-directed RNA polymerase I subunit RPA2 OS=Homo sapiens GN=POLR1B PE=1 SV=2 - [RPA2_HUMAN] | | Condensin-2 complex subunit G2 OS=Homo sapiens GN=NCAPG2 PE=1 SV=1 - [CNDG2_HUMAN] | | Kinesin-1 heavy chain OS=Homo sapiens GN=KIF5B PE=1 SV=1 - [KINH_HUMAN] | | Helicase-like transcription factor OS=Homo sapiens GN=HLTF PE=1 SV=2 - [HLTF_HUMAN] | | Importin-5 OS=Homo sapiens GN=IPO5 PE=1 SV=4 - [IPO5_HUMAN] | | DNA2-like helicase OS=Homo sapiens GN=DNA2 PE=1 SV=3 - [DNA2L_HUMAN] | | Ubiquitin D OS=Homo sapiens GN=UBD PE=1 SV=2 - [UBD_HUMAN] | | WASH complex subunit strumpellin OS=Homo sapiens GN=KIAA0196 PE=1 SV=1 - [STRUM_HUMAN] | | Rho guanine nucleotide exchange factor 2 OS=Homo sapiens GN=ARHGEF2 PE=1 SV=4 - [ARHG2_HUMAN] | | Ribonucleases P/MRP protein subunit POP1 OS=Homo sapiens GN=POP1 PE=1 SV=2 - [POP1_HUMAN] | | Desmoplakin OS=Homo sapiens GN=DSP PE=1 SV=3 - [DESP_HUMAN] | | Ubiquitin-like modifier-activating enzyme 1 OS=Homo sapiens GN=UBA1 PE=1 SV=3 - [UBA1_HUMAN] | | Polyubiquitin-C OS=Homo sapiens GN=UBC PE=1 SV=3 - [UBC_HUMAN] | | Tubulin-specific chaperone D OS=Homo sapiens GN=TBCD PE=1 SV=2 - [TBCD_HUMAN] | | WD repeat-containing protein 11 OS=Homo sapiens GN=WDR11 PE=1 SV=1 - [WDR11_HUMAN] | | RNA-binding protein 10 OS=Homo sapiens GN=RBM10 PE=1 SV=3 - [RBM10_HUMAN] | | Zinc finger and BTB domain-containing protein 10 OS=Homo sapiens GN=ZBTB10 PE=1 SV=2 - [ZBT10_HUMAN] | | Putative pre-mRNA-splicing factor ATP-dependent RNA helicase DHX16 OS=Homo sapiens GN=DHX16 PE=1 SV=2 - [DHX16_HUMAN] | | Extended synaptotagmin-1 OS=Homo sapiens GN=ESYT1 PE=1 SV=1 - [ESYT1_HUMAN] | | Serine/threonine-protein kinase N2 OS=Homo sapiens GN=PKN2 PE=1 SV=1 - [PKN2_HUMAN] | | DNA mismatch repair protein Msh6 OS=Homo sapiens GN=MSH6 PE=1 SV=2 - [MSH6_HUMAN] | | Calcium homeostasis endoplasmic reticulum protein OS=Homo sapiens GN=CHERP PE=1 SV=3 - [CHERP_HUMAN] | | Nuclear pore complex protein Nup133 OS=Homo sapiens GN=NUP133 PE=1 SV=2 - [NU133_HUMAN] | | Pre-mRNA-processing factor 40 homolog A OS=Homo sapiens GN=PRPF40A PE=1 SV=2 - [PR40A_HUMAN] | | Focal adhesion kinase 1 OS=Homo sapiens GN=PTK2 PE=1 SV=2 - [FAK1_HUMAN] | | Serrate RNA effector molecule homolog OS=Homo sapiens GN=SRRT PE=1 SV=1 - [SRRT_HUMAN] | | Heterogeneous nuclear ribonucleoprotein U OS=Homo sapiens GN=HNRNPU PE=1 SV=6 - [HNRPU_HUMAN] | | Kinesin-like protein KIF23 OS=Homo sapiens GN=KIF23 PE=1 SV=3 - [KIF23_HUMAN] | | Putative helicase MOV-10 OS=Homo sapiens GN=MOV10 PE=1 SV=2 - [MOV10_HUMAN] | | ATP-dependent RNA helicase DDX42 OS=Homo sapiens GN=DDX42 PE=1 SV=1 - [DDX42_HUMAN] | | Serine/threonine-protein phosphatase 6 regulatory subunit 3 OS=Homo sapiens GN=PPP6R3 PE=1 SV=2 - [PP6R3_HUMAN] | | Elongation factor 2 OS=Homo sapiens GN=EEF2 PE=1 SV=4 - [EF2_HUMAN] | | Host cell factor 1 OS=Homo sapiens GN=HCFC1 PE=1 SV=2 - [HCFC1_HUMAN] | | Protein transport protein Sec24C OS=Homo sapiens GN=SEC24C PE=1 SV=3 - [SC24C_HUMAN] | | Transmembrane and coiled-coil domain-containing protein 7 OS=Homo sapiens GN=TMCO7 PE=2 SV=2 - [TMCO7_HUMAN] | | Uncharacterized protein KIAA0528 OS=Homo sapiens GN=KIAA0528 PE=1 SV=1 - [K0528_HUMAN] | | MAP7 domain-containing protein 1 OS=Homo sapiens GN=MAP7D1 PE=1 SV=1 - [MA7D1_HUMAN] | | ELKS/Rab6-interacting/CAST family member 1 OS=Homo sapiens GN=ERC1 PE=1 SV=1 - [RB6I2_HUMAN] | | Histone lysine demethylase PHF8 OS=Homo sapiens GN=PHF8 PE=1 SV=3 - [PHF8_HUMAN] | | Importin-9 OS=Homo sapiens GN=IPO9 PE=1 SV=3 - [IPO9_HUMAN] | | CLIP-associating protein 2 OS=Homo sapiens GN=CLASP2 PE=1 SV=2 - [CLAP2_HUMAN] | | Poly(ADP-ribose) glycohydrolase OS=Homo sapiens GN=PARG PE=1 SV=1 - [PARG_HUMAN] | | Spectrin alpha chain, brain OS=Homo sapiens GN=SPTAN1 PE=1 SV=3 - [SPTA2_HUMAN] | | A-kinase anchor protein 2 OS=Homo sapiens GN=AKAP2 PE=1 SV=3 - [AKAP2_HUMAN] | | Cullin-associated NEDD8-dissociated protein 1 OS=Homo sapiens GN=CAND1 PE=1 SV=2 - [CAND1_HUMAN] | | ATP-dependent RNA helicase A OS=Homo sapiens GN=DHX9 PE=1 SV=4 - [DHX9_HUMAN] | | U2 snRNP-associated SURP motif-containing protein OS=Homo sapiens GN=U2SURP PE=1 SV=2 - [SR140_HUMAN] | | DBIRD complex subunit KIAA1967 OS=Homo sapiens GN=KIAA1967 PE=1 SV=2 - [K1967_HUMAN] | | Phosphofurin acidic cluster sorting protein 1 OS=Homo sapiens GN=PACS1 PE=1 SV=2 - [PACS1_HUMAN] | | Ran-binding protein 6 OS=Homo sapiens GN=RANBP6 PE=1 SV=2 - [RNBP6_HUMAN] | | MAP7 domain-containing protein 3 OS=Homo sapiens GN=MAP7D3 PE=1 SV=2 - [MA7D3_HUMAN] | | Unconventional myosin-Id OS=Homo sapiens GN=MYO1D PE=1 SV=2 - [MYO1D_HUMAN] | | N-acetyltransferase 10 OS=Homo sapiens GN=NAT10 PE=1 SV=2 - [NAT10_HUMAN] | | Vimentin OS=Homo sapiens GN=VIM PE=1 SV=4 - [VIME_HUMAN] | | Formin-like protein 3 OS=Homo sapiens GN=FMNL3 PE=1 SV=3 - [FMNL3_HUMAN] | | DNA polymerase delta catalytic subunit OS=Homo sapiens GN=POLD1 PE=1 SV=2 - [DPOD1_HUMAN] | | E3 ubiquitin-protein ligase TRIM37 OS=Homo sapiens GN=TRIM37 PE=1 SV=2 - [TRI37_HUMAN] | | Staphylococcal nuclease domain-containing protein 1 OS=Homo sapiens GN=SND1 PE=1 SV=1 - [SND1_HUMAN] | | Cytospin-A OS=Homo sapiens GN=SPECC1L PE=1 SV=2 - [CYTSA_HUMAN] | | GC-rich sequence DNA-binding factor 1 OS=Homo sapiens GN=GCFC1 PE=1 SV=2 - [GCFC1_HUMAN] | | Regulator of nonsense transcripts 1 OS=Homo sapiens GN=UPF1 PE=1 SV=2 - [RENT1_HUMAN] | | RNA-binding protein 12B OS=Homo sapiens GN=RBM12B PE=1 SV=2 - [RB12B_HUMAN] | | Nuclear pore complex protein Nup155 OS=Homo sapiens GN=NUP155 PE=1 SV=1 - [NU155_HUMAN] | | Liprin-beta-1 OS=Homo sapiens GN=PPFIBP1 PE=1 SV=2 - [LIPB1_HUMAN] | | SWI/SNF-related matrix-associated actin-dependent regulator of chromatin subfamily A-like protein 1 OS=Homo sapiens GN=SMARCAL1 PE=1 SV=1 - [SMAL1_HUMAN] | | 2'-5'-oligoadenylate synthase 3 OS=Homo sapiens GN=OAS3 PE=1 SV=3 - [OAS3_HUMAN] | | Chromosome transmission fidelity protein 18 homolog OS=Homo sapiens GN=CHTF18 PE=1 SV=1 - [CTF18_HUMAN] | | Actin-binding protein anillin OS=Homo sapiens GN=ANLN PE=1 SV=2 - [ANLN_HUMAN] | | Matrin-3 OS=Homo sapiens GN=MATR3 PE=1 SV=2 - [MATR3_HUMAN] | | Importin-4 OS=Homo sapiens GN=IPO4 PE=1 SV=2 - [IPO4_HUMAN] | | Constitutive coactivator of PPAR-gamma-like protein 2 OS=Homo sapiens GN=FAM120C PE=2 SV=3 - [F120C_HUMAN] | | RNA-binding protein 25 OS=Homo sapiens GN=RBM25 PE=1 SV=3 - [RBM25_HUMAN] | | Exosome complex exonuclease RRP44 OS=Homo sapiens GN=DIS3 PE=1 SV=2 - [RRP44_HUMAN] | | Ubiquitin carboxyl-terminal hydrolase 15 OS=Homo sapiens GN=USP15 PE=1 SV=3 - [UBP15_HUMAN] | | Eukaryotic translation initiation factor 3 subunit B OS=Homo sapiens GN=EIF3B PE=1 SV=3 - [EIF3B_HUMAN] | | Exportin-6 OS=Homo sapiens GN=XPO6 PE=1 SV=1 - [XPO6_HUMAN] | | Ubiquitin carboxyl-terminal hydrolase 48 OS=Homo sapiens GN=USP48 PE=1 SV=1 - [UBP48_HUMAN] | | Nuclear pore complex protein Nup107 OS=Homo sapiens GN=NUP107 PE=1 SV=1 - [NU107_HUMAN] | | Centrosomal protein of 120 kDa OS=Homo sapiens GN=CEP120 PE=2 SV=2 - [CE120_HUMAN] | | La-related protein 1 OS=Homo sapiens GN=LARP1 PE=1 SV=2 - [LARP1_HUMAN] | | Tubulin alpha-1C chain OS=Homo sapiens GN=TUBA1C PE=1 SV=1 - [TBA1C_HUMAN] | | E3 SUMO-protein ligase RanBP2 OS=Homo sapiens GN=RANBP2 PE=1 SV=2 - [RBP2_HUMAN] | | Tubulin beta-4A chain OS=Homo sapiens GN=TUBB4A PE=1 SV=2 - [TBB4A_HUMAN] | | Myosin-11 OS=Homo sapiens GN=MYH11 PE=1 SV=3 - [MYH11_HUMAN] | | ATP-dependent RNA helicase DHX8 OS=Homo sapiens GN=DHX8 PE=1 SV=1 - [DHX8_HUMAN] | | Probable ATP-dependent RNA helicase DHX36 OS=Homo sapiens GN=DHX36 PE=1 SV=2 - [DHX36_HUMAN] | | DNA-binding protein SMUBP-2 OS=Homo sapiens GN=IGHMBP2 PE=1 SV=3 - [SMBP2_HUMAN] | | Spectrin beta chain, brain 1 OS=Homo sapiens GN=SPTBN1 PE=1 SV=2 - [SPTB2_HUMAN] | | Phosphorylase b kinase regulatory subunit beta OS=Homo sapiens GN=PHKB PE=1 SV=3 - [KPBB_HUMAN] | | Alpha-actinin-1 OS=Homo sapiens GN=ACTN1 PE=1 SV=2 - [ACTN1_HUMAN] | | MMS19 nucleotide excision repair protein homolog OS=Homo sapiens GN=MMS19 PE=1 SV=2 - [MMS19_HUMAN] | | Transcription elongation factor SPT5 OS=Homo sapiens GN=SUPT5H PE=1 SV=1 - [SPT5H_HUMAN] | | Sodium/potassium-transporting ATPase subunit alpha-1 OS=Homo sapiens GN=ATP1A1 PE=1 SV=1 - [AT1A1_HUMAN] | | Partitioning defective 3 homolog OS=Homo sapiens GN=PARD3 PE=1 SV=2 - [PARD3_HUMAN] | | Tubulin polyglutamylase TTLL4 OS=Homo sapiens GN=TTLL4 PE=1 SV=2 - [TTLL4_HUMAN] | | Ubiquitin-like modifier-activating enzyme 6 OS=Homo sapiens GN=UBA6 PE=1 SV=1 - [UBA6_HUMAN] | | Ubiquitin-protein ligase E3C OS=Homo sapiens GN=UBE3C PE=1 SV=3 - [UBE3C_HUMAN] | | ADP/ATP translocase 2 OS=Homo sapiens GN=SLC25A5 PE=1 SV=7 - [ADT2_HUMAN] | | Pre-mRNA-processing factor 6 OS=Homo sapiens GN=PRPF6 PE=1 SV=1 - [PRP6_HUMAN] | | Cytospin-B OS=Homo sapiens GN=SPECC1 PE=1 SV=1 - [CYTSB_HUMAN] | | Nodal modulator 3 OS=Homo sapiens GN=NOMO3 PE=2 SV=2 - [NOMO3_HUMAN] | | Elongation factor 1-alpha 1 OS=Homo sapiens GN=EEF1A1 PE=1 SV=1 - [EF1A1_HUMAN] | | ATP-dependent DNA helicase Q5 OS=Homo sapiens GN=RECQL5 PE=1 SV=2 - [RECQ5_HUMAN] | | Ankyrin-3 OS=Homo sapiens GN=ANK3 PE=1 SV=3 - [ANK3_HUMAN] | | DNA-directed RNA polymerase II subunit RPB2 OS=Homo sapiens GN=POLR2B PE=1 SV=1 - [RPB2_HUMAN] | |  | |
| --- | --- | --- | --- | --- | --- | --- | --- | --- | --- | --- | --- | --- | --- | --- | --- | --- | --- | --- | --- | --- | --- | --- | --- | --- | --- | --- | --- | --- | --- | --- | --- | --- | --- | --- | --- | --- | --- | --- | --- | --- | --- | --- | --- | --- | --- | --- | --- | --- | --- | --- | --- | --- | --- | --- | --- | --- | --- | --- | --- | --- | --- | --- | --- | --- | --- | --- | --- | --- | --- | --- | --- | --- | --- | --- | --- | --- | --- | --- | --- | --- | --- | --- | --- | --- | --- | --- | --- | --- | --- | --- | --- | --- | --- | --- | --- | --- | --- | --- | --- | --- | --- | --- | --- | --- | --- | --- | --- | --- | --- | --- | --- | --- | --- | --- | --- | --- | --- | --- | --- | --- | --- | --- | --- | --- | --- | --- | --- | --- | --- | --- | --- | --- | --- | --- | --- | --- | --- | --- | --- | --- | --- | --- | --- | --- | --- | --- | --- | --- | --- | --- | --- | --- | --- | --- | --- | --- | --- | --- | --- | --- | --- | --- | --- | --- | --- | --- | --- | --- | --- | --- | --- | --- | --- | --- | --- | --- | --- | --- | --- | --- | --- | --- | --- | --- | --- | --- | --- | --- | --- | --- | --- | --- | --- | --- | --- | --- | --- | --- | --- | --- | --- | --- | --- | --- | --- | --- | --- | --- | --- | --- | --- | --- | --- | --- | --- | --- | --- | --- | --- | --- | --- | --- | --- | --- | --- | --- | --- | --- | --- | --- | --- | --- | --- | --- | --- | --- | --- | --- | --- | --- | --- | --- | --- | --- | --- | --- | --- | --- | --- | --- | --- | --- | --- | --- | --- | --- | --- | --- | --- | --- | --- | --- | --- | --- | --- | --- | --- | --- | --- | --- | --- | --- | --- | --- | --- | --- | --- | --- | --- | --- | --- | --- | --- | --- | --- | --- | --- | --- | --- | --- | --- | --- | --- | --- | --- | --- | --- | --- | --- | --- | --- | --- | --- | --- | --- | --- | --- | --- | --- | --- | --- | --- | --- | --- | --- | --- | --- | --- | --- | --- | --- | --- | --- | --- | --- | --- | --- | --- | --- | --- | --- | --- | --- | --- | --- | --- | --- | --- | --- | --- | --- | --- | --- | --- | --- | --- | --- | --- | --- | --- | --- | --- | --- | --- | --- | --- | --- | --- | --- | --- | --- | --- | --- | --- | --- | --- | --- | --- | --- | --- | --- | --- | --- | --- | --- | --- | --- | --- | --- | --- | --- | --- | --- | --- | --- | --- | --- | --- | --- | --- | --- | --- | --- | --- | --- | --- | --- | --- | --- | --- | --- | --- | --- | --- | --- | --- | --- | --- | --- | --- | --- | --- | --- | --- | --- | --- | --- | --- | --- | --- | --- | --- | --- | --- | --- | --- | --- | --- | --- | --- | --- | --- | --- | --- | --- | --- | --- | --- | --- | --- | --- | --- | --- | --- | --- | --- | --- | --- | --- | --- | --- | --- | --- | --- | --- | --- | --- | --- | --- | --- | --- | --- | --- | --- | --- | --- | --- | --- | --- | --- | --- | --- | --- | --- | --- | --- | --- | --- | --- | --- | --- | --- | --- | --- | --- | --- | --- | --- | --- | --- | --- | --- | --- | --- | --- | --- | --- | --- | --- | --- | --- | --- | --- | --- | --- | --- | --- | --- | --- | --- | --- | --- | --- | --- | --- | --- | --- | --- | --- | --- | --- | --- | --- | --- | --- | --- | --- | --- | --- | --- | --- | --- | --- | --- | --- | --- | --- | --- | --- | --- | --- | --- | --- | --- | --- | --- | --- | --- | --- | --- | --- | --- | --- | --- | --- | --- | --- | --- | --- | --- | --- | --- | --- | --- | --- | --- | --- | --- | --- | --- | --- | --- | --- | --- | --- | --- | --- | --- | --- | --- | --- | --- | --- | --- | --- | --- | --- | --- | --- | --- | --- | --- | --- | --- | --- | --- | --- | --- | --- | --- | --- | --- | --- | --- | --- | --- | --- | --- | --- | --- | --- | --- | --- | --- | --- | --- | --- | --- | --- | --- | --- | --- | --- | --- | --- | --- | --- | --- | --- | --- | --- | --- | --- | --- | --- | --- | --- | --- | --- | --- | --- | --- | --- | --- | --- | --- | --- | --- | --- | --- | --- | --- | --- | --- | --- | --- | --- | --- | --- | --- | --- | --- | --- | --- | --- | --- | --- | --- | --- | --- | --- | --- | --- | --- | --- | --- | --- | --- | --- | --- | --- | --- | --- | --- | --- | --- | --- | --- | --- | --- | --- | --- | --- | --- | --- | --- | --- | --- | --- | --- | --- | --- | --- | --- | --- | --- | --- | --- | --- | --- | --- | --- | --- | --- | --- | --- | --- | --- | --- | --- | --- | --- | --- | --- | --- | --- | --- | --- | --- | --- | --- | --- | --- | --- | --- | --- | --- | --- | --- | --- | --- | --- | --- | --- | --- | --- | --- | --- | --- | --- | --- | --- | --- | --- | --- | --- | --- | --- | --- | --- | --- | --- | --- | --- | --- | --- | --- | --- | --- | --- | --- | --- | --- | --- | --- | --- | --- | --- | --- | --- | --- | --- | --- | --- | --- | --- | --- | --- | --- | --- | --- | --- | --- | --- | --- | --- | --- | --- | --- | --- | --- | --- | --- | --- | --- | --- | --- | --- | --- | --- | --- | --- | --- | --- | --- | --- | --- | --- | --- | --- | --- | --- | --- | --- | --- | --- | --- | --- | --- | --- | --- | --- | --- | --- | --- | --- | --- | --- | --- | --- | --- | --- | --- | --- | --- | --- | --- | --- | --- | --- | --- | --- | --- | --- | --- | --- | --- | --- | --- | --- | --- | --- | --- | --- | --- | --- | --- | --- | --- | --- | --- | --- | --- | --- | --- | --- | --- | --- | --- | --- | --- | --- | --- | --- | --- | --- | --- | --- | --- | --- | --- | --- | --- | --- | --- | --- | --- | --- | --- | --- | --- | --- | --- | --- | --- | --- | --- | --- | --- | --- | --- | --- | --- | --- | --- | --- | --- | --- | --- | --- | --- | --- | --- | --- | --- | --- | --- | --- | --- | --- | --- | --- | --- | --- | --- | --- | --- | --- | --- | --- | --- | --- | --- | --- | --- | --- | --- | --- | --- | --- | --- | --- | --- | --- | --- | --- | --- | --- | --- | --- | --- | --- | --- | --- | --- | --- | --- | --- | --- | --- | --- | --- | --- | --- | --- | --- | --- | --- | --- | --- | --- | --- | --- | --- | --- | --- | --- | --- | --- | --- | --- | --- | --- | --- | --- | --- | --- | --- | --- | --- | --- | --- | --- | --- | --- | --- | --- | --- | --- | --- | --- | --- | --- | --- | --- | --- | --- | --- | --- | --- | --- | --- | --- | --- | --- | --- | --- | --- | --- | --- | --- | --- | --- | --- | --- | --- | --- | --- | --- | --- | --- | --- | --- | --- | --- | --- | --- | --- | --- | --- | --- | --- | --- | --- | --- | --- | --- | --- | --- | --- | --- | --- | --- | --- | --- | --- | --- | --- | --- | --- | --- | --- | --- | --- | --- | --- | --- | --- | --- | --- | --- | --- | --- | --- | --- | --- | --- | --- | --- | --- | --- | --- | --- | --- | --- | --- | --- | --- | --- | --- | --- | --- | --- | --- | --- | --- | --- | --- | --- | --- | --- | --- | --- | --- | --- | --- | --- | --- | --- | --- | --- | --- | --- | --- | --- | --- | --- | --- | --- | --- | --- | --- | --- | --- | --- | --- | --- | --- | --- | --- | --- | --- | --- | --- | --- | --- | --- | --- | --- | --- | --- | --- | --- | --- | --- | --- | --- | --- | --- | --- |

**Sample S2:**

| | Accession | | --- | | O43795 | | O95071 | | Q86VP6 | | P28340 | | Q92900 | | Q9BZH6 | | Q7L2E3 | | Q9P2J5 | | Q8WUM0 | | P30876 | | O15205 | | P09874 | | P0CG48 | | Q08211 | | P58107 | | Q7L014 | | Q9HAV4 | | Q96KR1 | | Q15393 | | O14974 | | Q14152 | | P15924 | | P52701 | | P78347 | | O60264 | | Q8IUD2 | | Q96SB8 | | O00203 | | Q9NZB2 | | Q9UPP1 | | O15042 | | P42285 | | Q86XI2 | | Q6WCQ1 | | P29597 | | Q15149 | | O00159 | | O00411 | | O15083 | | P57737 | | P52732 | | Q93009 | | Q9P0K7 | | Q8TEW0 | | O60231 | | Q08379 | | Q9NW08 | | O75122 | | Q8IWC1 | | P51610 | | O75694 | | Q96N67 | | Q8WVS4 | | Q96Q05 | | P22314 | | Q3KQU3 | | P53396 | | O14980 | | Q96F07 | | O75150 | | Q8IY18 | | Q14157 | | Q14147 | | Q7Z460 | | P20585 | | Q7L576 | | Q16531 | | Q13523 | | P53621 | | P46379 | | Q86W56 | | Q9UM54 | | Q659C4 | | Q69YQ0 | | P78527 | | Q2M389 | | P69849 | | Q8N3U4 | | Q70EL4 | | Q10570 | | Q13813 | | Q8IXT5 | | O75533 | | Q9Y6X9 | | P23458 | | Q8IVF7 | | Q12965 | | Q15424 | | Q99569 | | O95163 | | Q9NQW6 | | Q504Q3 | | Q6P1N0 | | Q5M775 | | Q13751 | | P35580 | | O60879 | | Q14527 | | Q99613 | | Q8TF46 | | Q14562 | | O75044 | | Q9H6S0 | | Q9BSJ8 | | Q99575 | | Q14145 | | O75717 | | Q86V48 | | Q5SVZ6 | | Q99707 | | Q14151 | | P18206 | | Q8IX01 | | O60282 | | Q9NSV4 | | Q6ZRQ5 | | Q9BQE3 | | P53992 | | P57740 | | Q12769 | | Q92540 | | P41252 | | Q9HCE1 | | P05141 | |  | | | Coverage | | --- | | 23.94 | | 11.00 | | 15.69 | | 14.81 | | 16.21 | | 12.99 | | 13.48 | | 12.93 | | 9.78 | | 15.84 | | 29.09 | | 4.04 | | 52.55 | | 8.19 | | 14.93 | | 11.25 | | 11.21 | | 9.12 | | 7.72 | | 7.57 | | 7.38 | | 4.70 | | 7.50 | | 10.22 | | 3.99 | | 5.65 | | 9.07 | | 6.49 | | 9.21 | | 5.75 | | 6.03 | | 7.77 | | 4.90 | | 9.37 | | 5.39 | | 3.16 | | 7.43 | | 5.61 | | 4.08 | | 3.03 | | 6.25 | | 8.71 | | 5.71 | | 1.55 | | 7.97 | | 3.39 | | 4.15 | | 3.55 | | 3.20 | | 2.51 | | 3.81 | | 2.71 | | 4.97 | | 5.57 | | 5.29 | | 2.97 | | 5.81 | | 3.83 | | 6.42 | | 5.00 | | 5.72 | | 3.04 | | 2.97 | | 3.51 | | 3.34 | | 6.94 | | 5.00 | | 3.77 | | 4.25 | | 4.15 | | 4.20 | | 2.70 | | 2.41 | | 3.76 | | 0.94 | | 3.24 | | 3.19 | | 2.27 | | 4.36 | | 2.15 | | 1.42 | | 2.30 | | 1.61 | | 1.94 | | 1.99 | | 2.43 | | 2.08 | | 2.40 | | 2.77 | | 1.58 | | 2.67 | | 2.16 | | 2.21 | | 2.43 | | 1.96 | | 1.42 | | 2.09 | | 4.16 | | 2.08 | | 2.09 | | 1.72 | | 1.77 | | 3.15 | | 3.80 | | 2.25 | | 4.97 | | 1.77 | | 3.35 | | 1.75 | | 1.98 | | 2.31 | | 2.73 | | 2.03 | | 2.19 | | 1.84 | | 2.41 | | 4.23 | | 1.46 | | 2.16 | | 1.39 | | 1.93 | | 1.43 | | 1.99 | | 5.70 | |  | | | # PSMs | | --- | | 64 | | 39 | | 27 | | 31 | | 33 | | 28 | | 28 | | 21 | | 17 | | 28 | | 16 | | 8 | | 21 | | 16 | | 18 | | 17 | | 19 | | 15 | | 14 | | 12 | | 16 | | 17 | | 12 | | 17 | | 13 | | 10 | | 12 | | 10 | | 13 | | 9 | | 7 | | 14 | | 9 | | 12 | | 8 | | 17 | | 12 | | 8 | | 7 | | 4 | | 9 | | 11 | | 9 | | 5 | | 12 | | 7 | | 7 | | 7 | | 5 | | 7 | | 7 | | 9 | | 8 | | 7 | | 7 | | 3 | | 10 | | 5 | | 13 | | 8 | | 8 | | 4 | | 7 | | 8 | | 4 | | 11 | | 5 | | 5 | | 8 | | 8 | | 5 | | 5 | | 3 | | 6 | | 5 | | 5 | | 4 | | 3 | | 6 | | 5 | | 5 | | 3 | | 5 | | 3 | | 3 | | 4 | | 4 | | 3 | | 5 | | 3 | | 3 | | 5 | | 5 | | 4 | | 4 | | 6 | | 3 | | 4 | | 3 | | 3 | | 4 | | 3 | | 4 | | 4 | | 4 | | 5 | | 3 | | 3 | | 2 | | 2 | | 2 | | 7 | | 3 | | 3 | | 2 | | 3 | | 2 | | 3 | | 3 | | 3 | | 2 | | 2 | | 2 | | 2 | |  | | | # Peptides | | --- | | 22 | | 22 | | 15 | | 14 | | 16 | | 12 | | 14 | | 11 | | 9 | | 16 | | 4 | | 3 | | 4 | | 8 | | 9 | | 10 | | 10 | | 7 | | 7 | | 6 | | 9 | | 11 | | 9 | | 10 | | 5 | | 6 | | 8 | | 7 | | 8 | | 5 | | 5 | | 7 | | 5 | | 7 | | 5 | | 14 | | 6 | | 5 | | 4 | | 2 | | 5 | | 7 | | 5 | | 2 | | 7 | | 3 | | 4 | | 4 | | 3 | | 4 | | 4 | | 5 | | 4 | | 5 | | 4 | | 2 | | 5 | | 3 | | 8 | | 4 | | 6 | | 2 | | 3 | | 5 | | 3 | | 8 | | 4 | | 3 | | 5 | | 4 | | 3 | | 3 | | 2 | | 4 | | 3 | | 3 | | 3 | | 2 | | 4 | | 3 | | 3 | | 2 | | 2 | | 2 | | 2 | | 2 | | 2 | | 2 | | 3 | | 2 | | 2 | | 3 | | 2 | | 2 | | 2 | | 3 | | 2 | | 3 | | 2 | | 2 | | 2 | | 2 | | 4 | | 3 | | 2 | | 3 | | 2 | | 3 | | 2 | | 2 | | 2 | | 3 | | 2 | | 2 | | 2 | | 3 | | 2 | | 2 | | 2 | | 2 | | 2 | | 2 | | 2 | | 2 | |  | | | # AAs | | --- | | 1136 | | 2799 | | 1230 | | 1107 | | 1129 | | 1224 | | 1194 | | 1176 | | 1156 | | 1174 | | 165 | | 1014 | | 685 | | 1270 | | 5090 | | 1031 | | 1204 | | 1074 | | 1217 | | 1030 | | 1382 | | 2871 | | 1360 | | 998 | | 1052 | | 1116 | | 1091 | | 1094 | | 1118 | | 1060 | | 1029 | | 1042 | | 1143 | | 1025 | | 1187 | | 4684 | | 1063 | | 1230 | | 957 | | 925 | | 1056 | | 1102 | | 980 | | 1356 | | 1041 | | 1002 | | 1133 | | 1294 | | 876 | | 2035 | | 1391 | | 2140 | | 1066 | | 1148 | | 1058 | | 841 | | 1101 | | 1071 | | 1278 | | 1001 | | 1101 | | 1087 | | 1143 | | 1538 | | 1137 | | 1253 | | 1140 | | 1007 | | 1224 | | 1132 | | 976 | | 1294 | | 914 | | 1117 | | 4128 | | 1173 | | 1222 | | 1231 | | 1123 | | 1443 | | 2472 | | 1001 | | 1304 | | 1032 | | 1154 | | 1028 | | 1108 | | 915 | | 1192 | | 1332 | | 1124 | | 1202 | | 951 | | 1068 | | 1172 | | 1976 | | 1101 | | 1009 | | 913 | | 1054 | | 1220 | | 1071 | | 1430 | | 1104 | | 1024 | | 624 | | 1129 | | 1076 | | 1142 | | 1265 | | 953 | | 1134 | | 1082 | | 957 | | 1193 | | 1243 | | 449 | | 1094 | | 925 | | 1436 | | 1137 | | 1262 | | 1003 | | 298 | |  | | | MW [kDa] | | --- | | 131.9 | | 309.2 | | 136.3 | | 123.6 | | 124.3 | | 136.6 | | 133.9 | | 134.4 | | 128.9 | | 133.8 | | 18.5 | | 113.0 | | 77.0 | | 140.9 | | 555.3 | | 117.3 | | 136.2 | | 116.9 | | 135.5 | | 115.2 | | 166.5 | | 331.6 | | 152.7 | | 112.3 | | 121.8 | | 128.0 | | 126.2 | | 121.2 | | 121.8 | | 117.8 | | 118.2 | | 117.7 | | 130.9 | | 116.5 | | 133.6 | | 531.5 | | 121.6 | | 138.5 | | 110.5 | | 100.5 | | 119.1 | | 128.2 | | 110.0 | | 151.3 | | 119.2 | | 113.0 | | 127.7 | | 141.0 | | 98.4 | | 208.6 | | 155.1 | | 242.4 | | 122.5 | | 128.4 | | 117.8 | | 92.8 | | 120.8 | | 123.3 | | 148.3 | | 113.6 | | 128.7 | | 114.5 | | 128.0 | | 169.3 | | 127.3 | | 145.1 | | 126.9 | | 116.9 | | 138.3 | | 119.3 | | 111.0 | | 149.6 | | 105.3 | | 124.5 | | 468.8 | | 136.3 | | 134.0 | | 141.2 | | 122.7 | | 160.8 | | 284.4 | | 118.0 | | 145.7 | | 117.7 | | 133.2 | | 117.1 | | 127.0 | | 102.6 | | 131.8 | | 150.2 | | 124.1 | | 135.3 | | 104.0 | | 118.5 | | 129.5 | | 228.9 | | 125.5 | | 113.9 | | 105.3 | | 120.7 | | 139.2 | | 120.8 | | 160.1 | | 122.8 | | 114.6 | | 69.6 | | 125.9 | | 120.2 | | 128.6 | | 140.4 | | 107.4 | | 123.7 | | 120.1 | | 109.4 | | 136.8 | | 142.2 | | 49.9 | | 118.2 | | 106.3 | | 162.0 | | 127.2 | | 144.4 | | 113.6 | | 32.8 | |  | | | calc. pI | | --- | | 9.38 | | 5.85 | | 5.78 | | 7.03 | | 6.61 | | 6.92 | | 8.78 | | 7.30 | | 5.10 | | 6.87 | | 8.90 | | 8.88 | | 7.66 | | 6.84 | | 5.60 | | 9.29 | | 5.80 | | 9.04 | | 5.26 | | 5.40 | | 6.79 | | 6.81 | | 6.90 | | 6.39 | | 8.09 | | 5.97 | | 6.99 | | 6.04 | | 8.88 | | 8.72 | | 8.47 | | 6.52 | | 6.87 | | 6.21 | | 7.15 | | 5.96 | | 9.41 | | 8.98 | | 6.99 | | 5.80 | | 5.64 | | 5.55 | | 6.21 | | 7.68 | | 6.80 | | 5.02 | | 8.50 | | 8.47 | | 9.32 | | 7.46 | | 6.16 | | 6.80 | | 7.31 | | 6.62 | | 5.76 | | 10.11 | | 7.33 | | 6.06 | | 7.31 | | 6.23 | | 8.38 | | 7.11 | | 7.56 | | 9.03 | | 8.02 | | 6.90 | | 5.26 | | 10.26 | | 7.66 | | 5.60 | | 6.43 | | 8.53 | | 7.61 | | 5.72 | | 7.12 | | 7.44 | | 5.67 | | 5.43 | | 9.19 | | 6.40 | | 5.35 | | 6.81 | | 7.09 | | 8.38 | | 7.55 | | 6.65 | | 8.92 | | 5.47 | | 8.94 | | 5.94 | | 8.07 | | 5.99 | | 8.09 | | 6.70 | | 7.21 | | 5.54 | | 6.58 | | 8.60 | | 5.68 | | 6.54 | | 8.32 | | 6.70 | | 8.40 | | 5.83 | | 9.22 | | 6.44 | | 5.62 | | 8.50 | | 7.44 | | 5.58 | | 6.16 | | 5.66 | | 7.28 | | 6.19 | | 7.03 | | 7.12 | | 5.10 | | 7.06 | | 5.43 | | 5.50 | | 8.72 | | 6.15 | | 8.82 | | 9.69 | |  | | | Score | | --- | | 1322.86 | | 711.68 | | 677.49 | | 608.15 | | 560.24 | | 526.92 | | 446.32 | | 423.29 | | 409.83 | | 392.36 | | 388.82 | | 365.52 | | 348.98 | | 341.13 | | 334.25 | | 329.28 | | 313.48 | | 306.37 | | 279.98 | | 267.31 | | 235.30 | | 230.25 | | 229.56 | | 225.95 | | 222.38 | | 221.49 | | 200.69 | | 195.35 | | 179.40 | | 177.70 | | 173.52 | | 173.42 | | 169.27 | | 168.83 | | 163.96 | | 157.22 | | 156.76 | | 156.32 | | 154.46 | | 141.55 | | 139.80 | | 136.97 | | 135.53 | | 132.63 | | 132.24 | | 131.85 | | 129.86 | | 126.18 | | 123.60 | | 117.78 | | 117.67 | | 116.51 | | 113.95 | | 113.81 | | 112.68 | | 109.48 | | 108.69 | | 108.66 | | 104.91 | | 103.27 | | 102.48 | | 100.97 | | 100.94 | | 99.08 | | 96.95 | | 96.62 | | 96.56 | | 95.91 | | 95.11 | | 92.41 | | 91.78 | | 91.19 | | 90.91 | | 81.76 | | 81.05 | | 79.99 | | 78.38 | | 74.36 | | 74.11 | | 72.57 | | 72.52 | | 71.38 | | 71.05 | | 70.65 | | 70.19 | | 67.31 | | 66.98 | | 66.50 | | 61.90 | | 61.45 | | 55.15 | | 54.51 | | 53.76 | | 53.14 | | 52.44 | | 51.22 | | 50.87 | | 49.51 | | 48.93 | | 48.79 | | 48.20 | | 48.04 | | 47.43 | | 44.59 | | 44.43 | | 41.24 | | 40.76 | | 40.73 | | 40.00 | | 39.02 | | 38.94 | | 38.32 | | 36.24 | | 35.40 | | 34.88 | | 33.84 | | 30.13 | | 30.02 | | 29.11 | | 28.23 | | 27.46 | | 26.59 | | 24.34 | | 23.02 | |  | | | Description | | --- | | Unconventional myosin-Ib OS=Homo sapiens GN=MYO1B PE=2 SV=3 - [MYO1B_HUMAN] | | E3 ubiquitin-protein ligase UBR5 OS=Homo sapiens GN=UBR5 PE=1 SV=2 - [UBR5_HUMAN] | | Cullin-associated NEDD8-dissociated protein 1 OS=Homo sapiens GN=CAND1 PE=1 SV=2 - [CAND1_HUMAN] | | DNA polymerase delta catalytic subunit OS=Homo sapiens GN=POLD1 PE=1 SV=2 - [DPOD1_HUMAN] | | Regulator of nonsense transcripts 1 OS=Homo sapiens GN=UPF1 PE=1 SV=2 - [RENT1_HUMAN] | | WD repeat-containing protein 11 OS=Homo sapiens GN=WDR11 PE=1 SV=1 - [WDR11_HUMAN] | | Putative ATP-dependent RNA helicase DHX30 OS=Homo sapiens GN=DHX30 PE=1 SV=1 - [DHX30_HUMAN] | | Leucine--tRNA ligase, cytoplasmic OS=Homo sapiens GN=LARS PE=1 SV=2 - [SYLC_HUMAN] | | Nuclear pore complex protein Nup133 OS=Homo sapiens GN=NUP133 PE=1 SV=2 - [NU133_HUMAN] | | DNA-directed RNA polymerase II subunit RPB2 OS=Homo sapiens GN=POLR2B PE=1 SV=1 - [RPB2_HUMAN] | | Ubiquitin D OS=Homo sapiens GN=UBD PE=1 SV=2 - [UBD_HUMAN] | | Poly [ADP-ribose] polymerase 1 OS=Homo sapiens GN=PARP1 PE=1 SV=4 - [PARP1_HUMAN] | | Polyubiquitin-C OS=Homo sapiens GN=UBC PE=1 SV=3 - [UBC_HUMAN] | | ATP-dependent RNA helicase A OS=Homo sapiens GN=DHX9 PE=1 SV=4 - [DHX9_HUMAN] | | Epiplakin OS=Homo sapiens GN=EPPK1 PE=1 SV=2 - [EPIPL_HUMAN] | | Probable ATP-dependent RNA helicase DDX46 OS=Homo sapiens GN=DDX46 PE=1 SV=2 - [DDX46_HUMAN] | | Exportin-5 OS=Homo sapiens GN=XPO5 PE=1 SV=1 - [XPO5_HUMAN] | | Zinc finger RNA-binding protein OS=Homo sapiens GN=ZFR PE=1 SV=2 - [ZFR_HUMAN] | | Splicing factor 3B subunit 3 OS=Homo sapiens GN=SF3B3 PE=1 SV=4 - [SF3B3_HUMAN] | | Protein phosphatase 1 regulatory subunit 12A OS=Homo sapiens GN=PPP1R12A PE=1 SV=1 - [MYPT1_HUMAN] | | Eukaryotic translation initiation factor 3 subunit A OS=Homo sapiens GN=EIF3A PE=1 SV=1 - [EIF3A_HUMAN] | | Desmoplakin OS=Homo sapiens GN=DSP PE=1 SV=3 - [DESP_HUMAN] | | DNA mismatch repair protein Msh6 OS=Homo sapiens GN=MSH6 PE=1 SV=2 - [MSH6_HUMAN] | | General transcription factor II-I OS=Homo sapiens GN=GTF2I PE=1 SV=2 - [GTF2I_HUMAN] | | SWI/SNF-related matrix-associated actin-dependent regulator of chromatin subfamily A member 5 OS=Homo sapiens GN=SMARCA5 PE=1 SV=1 - [SMCA5_HUMAN] | | ELKS/Rab6-interacting/CAST family member 1 OS=Homo sapiens GN=ERC1 PE=1 SV=1 - [RB6I2_HUMAN] | | Structural maintenance of chromosomes protein 6 OS=Homo sapiens GN=SMC6 PE=1 SV=2 - [SMC6_HUMAN] | | AP-3 complex subunit beta-1 OS=Homo sapiens GN=AP3B1 PE=1 SV=3 - [AP3B1_HUMAN] | | Constitutive coactivator of PPAR-gamma-like protein 1 OS=Homo sapiens GN=FAM120A PE=1 SV=2 - [F120A_HUMAN] | | Histone lysine demethylase PHF8 OS=Homo sapiens GN=PHF8 PE=1 SV=3 - [PHF8_HUMAN] | | U2 snRNP-associated SURP motif-containing protein OS=Homo sapiens GN=U2SURP PE=1 SV=2 - [SR140_HUMAN] | | Superkiller viralicidic activity 2-like 2 OS=Homo sapiens GN=SKIV2L2 PE=1 SV=3 - [SK2L2_HUMAN] | | Condensin-2 complex subunit G2 OS=Homo sapiens GN=NCAPG2 PE=1 SV=1 - [CNDG2_HUMAN] | | Myosin phosphatase Rho-interacting protein OS=Homo sapiens GN=MPRIP PE=1 SV=3 - [MPRIP_HUMAN] | | Non-receptor tyrosine-protein kinase TYK2 OS=Homo sapiens GN=TYK2 PE=1 SV=3 - [TYK2_HUMAN] | | Plectin OS=Homo sapiens GN=PLEC PE=1 SV=3 - [PLEC_HUMAN] | | Unconventional myosin-Ic OS=Homo sapiens GN=MYO1C PE=1 SV=4 - [MYO1C_HUMAN] | | DNA-directed RNA polymerase, mitochondrial OS=Homo sapiens GN=POLRMT PE=1 SV=2 - [RPOM_HUMAN] | | ERC protein 2 OS=Homo sapiens GN=ERC2 PE=1 SV=3 - [ERC2_HUMAN] | | Coronin-7 OS=Homo sapiens GN=CORO7 PE=1 SV=2 - [CORO7_HUMAN] | | Kinesin-like protein KIF11 OS=Homo sapiens GN=KIF11 PE=1 SV=2 - [KIF11_HUMAN] | | Ubiquitin carboxyl-terminal hydrolase 7 OS=Homo sapiens GN=USP7 PE=1 SV=2 - [UBP7_HUMAN] | | Ankycorbin OS=Homo sapiens GN=RAI14 PE=1 SV=2 - [RAI14_HUMAN] | | Partitioning defective 3 homolog OS=Homo sapiens GN=PARD3 PE=1 SV=2 - [PARD3_HUMAN] | | Putative pre-mRNA-splicing factor ATP-dependent RNA helicase DHX16 OS=Homo sapiens GN=DHX16 PE=1 SV=2 - [DHX16_HUMAN] | | Golgin subfamily A member 2 OS=Homo sapiens GN=GOLGA2 PE=1 SV=3 - [GOGA2_HUMAN] | | DNA-directed RNA polymerase III subunit RPC2 OS=Homo sapiens GN=POLR3B PE=1 SV=2 - [RPC2_HUMAN] | | CLIP-associating protein 2 OS=Homo sapiens GN=CLASP2 PE=1 SV=2 - [CLAP2_HUMAN] | | MAP7 domain-containing protein 3 OS=Homo sapiens GN=MAP7D3 PE=1 SV=2 - [MA7D3_HUMAN] | | Host cell factor 1 OS=Homo sapiens GN=HCFC1 PE=1 SV=2 - [HCFC1_HUMAN] | | Nuclear pore complex protein Nup155 OS=Homo sapiens GN=NUP155 PE=1 SV=1 - [NU155_HUMAN] | | Dedicator of cytokinesis protein 7 OS=Homo sapiens GN=DOCK7 PE=1 SV=4 - [DOCK7_HUMAN] | | WD repeat-containing protein 60 OS=Homo sapiens GN=WDR60 PE=1 SV=3 - [WDR60_HUMAN] | | Trafficking protein particle complex subunit 9 OS=Homo sapiens GN=TRAPPC9 PE=1 SV=2 - [TPPC9_HUMAN] | | Ubiquitin-like modifier-activating enzyme 1 OS=Homo sapiens GN=UBA1 PE=1 SV=3 - [UBA1_HUMAN] | | MAP7 domain-containing protein 1 OS=Homo sapiens GN=MAP7D1 PE=1 SV=1 - [MA7D1_HUMAN] | | ATP-citrate synthase OS=Homo sapiens GN=ACLY PE=1 SV=3 - [ACLY_HUMAN] | | Exportin-1 OS=Homo sapiens GN=XPO1 PE=1 SV=1 - [XPO1_HUMAN] | | Cytoplasmic FMR1-interacting protein 2 OS=Homo sapiens GN=CYFIP2 PE=1 SV=2 - [CYFP2_HUMAN] | | E3 ubiquitin-protein ligase BRE1B OS=Homo sapiens GN=RNF40 PE=1 SV=4 - [BRE1B_HUMAN] | | Structural maintenance of chromosomes protein 5 OS=Homo sapiens GN=SMC5 PE=1 SV=2 - [SMC5_HUMAN] | | Ubiquitin-associated protein 2-like OS=Homo sapiens GN=UBAP2L PE=1 SV=2 - [UBP2L_HUMAN] | | Probable ATP-dependent RNA helicase DHX34 OS=Homo sapiens GN=DHX34 PE=2 SV=2 - [DHX34_HUMAN] | | CLIP-associating protein 1 OS=Homo sapiens GN=CLASP1 PE=1 SV=1 - [CLAP1_HUMAN] | | DNA mismatch repair protein Msh3 OS=Homo sapiens GN=MSH3 PE=1 SV=4 - [MSH3_HUMAN] | | Cytoplasmic FMR1-interacting protein 1 OS=Homo sapiens GN=CYFIP1 PE=1 SV=1 - [CYFP1_HUMAN] | | DNA damage-binding protein 1 OS=Homo sapiens GN=DDB1 PE=1 SV=1 - [DDB1_HUMAN] | | Serine/threonine-protein kinase PRP4 homolog OS=Homo sapiens GN=PRPF4B PE=1 SV=3 - [PRP4B_HUMAN] | | Coatomer subunit alpha OS=Homo sapiens GN=COPA PE=1 SV=2 - [COPA_HUMAN] | | Large proline-rich protein BAG6 OS=Homo sapiens GN=BAG6 PE=1 SV=2 - [BAG6_HUMAN] | | Poly(ADP-ribose) glycohydrolase OS=Homo sapiens GN=PARG PE=1 SV=1 - [PARG_HUMAN] | | Unconventional myosin-VI OS=Homo sapiens GN=MYO6 PE=1 SV=4 - [MYO6_HUMAN] | | La-related protein 1B OS=Homo sapiens GN=LARP1B PE=1 SV=2 - [LAR1B_HUMAN] | | Cytospin-A OS=Homo sapiens GN=SPECC1L PE=1 SV=2 - [CYTSA_HUMAN] | | DNA-dependent protein kinase catalytic subunit OS=Homo sapiens GN=PRKDC PE=1 SV=3 - [PRKDC_HUMAN] | | WASH complex subunit 7 OS=Homo sapiens GN=KIAA1033 PE=1 SV=2 - [WASH7_HUMAN] | | Nodal modulator 3 OS=Homo sapiens GN=NOMO3 PE=2 SV=2 - [NOMO3_HUMAN] | | Cohesin subunit SA-2 OS=Homo sapiens GN=STAG2 PE=1 SV=3 - [STAG2_HUMAN] | | Ubiquitin carboxyl-terminal hydrolase 43 OS=Homo sapiens GN=USP43 PE=1 SV=2 - [UBP43_HUMAN] | | Cleavage and polyadenylation specificity factor subunit 1 OS=Homo sapiens GN=CPSF1 PE=1 SV=2 - [CPSF1_HUMAN] | | Spectrin alpha chain, brain OS=Homo sapiens GN=SPTAN1 PE=1 SV=3 - [SPTA2_HUMAN] | | RNA-binding protein 12B OS=Homo sapiens GN=RBM12B PE=1 SV=2 - [RB12B_HUMAN] | | Splicing factor 3B subunit 1 OS=Homo sapiens GN=SF3B1 PE=1 SV=3 - [SF3B1_HUMAN] | | MORC family CW-type zinc finger protein 2 OS=Homo sapiens GN=MORC2 PE=1 SV=2 - [MORC2_HUMAN] | | Tyrosine-protein kinase JAK1 OS=Homo sapiens GN=JAK1 PE=1 SV=2 - [JAK1_HUMAN] | | Formin-like protein 3 OS=Homo sapiens GN=FMNL3 PE=1 SV=3 - [FMNL3_HUMAN] | | Unconventional myosin-Ie OS=Homo sapiens GN=MYO1E PE=1 SV=2 - [MYO1E_HUMAN] | | Scaffold attachment factor B1 OS=Homo sapiens GN=SAFB PE=1 SV=4 - [SAFB1_HUMAN] | | Plakophilin-4 OS=Homo sapiens GN=PKP4 PE=1 SV=2 - [PKP4_HUMAN] | | Elongator complex protein 1 OS=Homo sapiens GN=IKBKAP PE=1 SV=3 - [ELP1_HUMAN] | | Actin-binding protein anillin OS=Homo sapiens GN=ANLN PE=1 SV=2 - [ANLN_HUMAN] | | PAB-dependent poly(A)-specific ribonuclease subunit 2 OS=Homo sapiens GN=PAN2 PE=1 SV=3 - [PAN2_HUMAN] | | Coiled-coil and C2 domain-containing protein 1A OS=Homo sapiens GN=CC2D1A PE=1 SV=1 - [C2D1A_HUMAN] | | Cytospin-B OS=Homo sapiens GN=SPECC1 PE=1 SV=1 - [CYTSB_HUMAN] | | Laminin subunit beta-3 OS=Homo sapiens GN=LAMB3 PE=1 SV=1 - [LAMB3_HUMAN] | | Myosin-10 OS=Homo sapiens GN=MYH10 PE=1 SV=3 - [MYH10_HUMAN] | | Protein diaphanous homolog 2 OS=Homo sapiens GN=DIAPH2 PE=1 SV=1 - [DIAP2_HUMAN] | | Helicase-like transcription factor OS=Homo sapiens GN=HLTF PE=1 SV=2 - [HLTF_HUMAN] | | Eukaryotic translation initiation factor 3 subunit C OS=Homo sapiens GN=EIF3C PE=1 SV=1 - [EIF3C_HUMAN] | | DIS3-like exonuclease 1 OS=Homo sapiens GN=DIS3L PE=1 SV=2 - [DI3L1_HUMAN] | | ATP-dependent RNA helicase DHX8 OS=Homo sapiens GN=DHX8 PE=1 SV=1 - [DHX8_HUMAN] | | SLIT-ROBO Rho GTPase-activating protein 2 OS=Homo sapiens GN=SRGAP2 PE=1 SV=2 - [FNBP2_HUMAN] | | Probable ATP-dependent RNA helicase YTHDC2 OS=Homo sapiens GN=YTHDC2 PE=1 SV=2 - [YTDC2_HUMAN] | | Extended synaptotagmin-1 OS=Homo sapiens GN=ESYT1 PE=1 SV=1 - [ESYT1_HUMAN] | | Ribonucleases P/MRP protein subunit POP1 OS=Homo sapiens GN=POP1 PE=1 SV=2 - [POP1_HUMAN] | | Kelch-like ECH-associated protein 1 OS=Homo sapiens GN=KEAP1 PE=1 SV=2 - [KEAP1_HUMAN] | | WD repeat and HMG-box DNA-binding protein 1 OS=Homo sapiens GN=WDHD1 PE=1 SV=1 - [WDHD1_HUMAN] | | Leucine zipper protein 1 OS=Homo sapiens GN=LUZP1 PE=1 SV=2 - [LUZP1_HUMAN] | | Zinc finger MYM-type protein 1 OS=Homo sapiens GN=ZMYM1 PE=1 SV=1 - [ZMYM1_HUMAN] | | Methionine synthase OS=Homo sapiens GN=MTR PE=1 SV=2 - [METH_HUMAN] | | Scaffold attachment factor B2 OS=Homo sapiens GN=SAFB2 PE=1 SV=1 - [SAFB2_HUMAN] | | Vinculin OS=Homo sapiens GN=VCL PE=1 SV=4 - [VINC_HUMAN] | | SURP and G-patch domain-containing protein 2 OS=Homo sapiens GN=SUGP2 PE=1 SV=2 - [SUGP2_HUMAN] | | Kinesin heavy chain isoform 5C OS=Homo sapiens GN=KIF5C PE=1 SV=1 - [KIF5C_HUMAN] | | Protein diaphanous homolog 3 OS=Homo sapiens GN=DIAPH3 PE=1 SV=4 - [DIAP3_HUMAN] | | Protein MMS22-like OS=Homo sapiens GN=MMS22L PE=1 SV=3 - [MMS22_HUMAN] | | Tubulin alpha-1C chain OS=Homo sapiens GN=TUBA1C PE=1 SV=1 - [TBA1C_HUMAN] | | Protein transport protein Sec24C OS=Homo sapiens GN=SEC24C PE=1 SV=3 - [SC24C_HUMAN] | | Nuclear pore complex protein Nup107 OS=Homo sapiens GN=NUP107 PE=1 SV=1 - [NU107_HUMAN] | | Nuclear pore complex protein Nup160 OS=Homo sapiens GN=NUP160 PE=1 SV=3 - [NU160_HUMAN] | | Protein SMG7 OS=Homo sapiens GN=SMG7 PE=1 SV=2 - [SMG7_HUMAN] | | Isoleucine--tRNA ligase, cytoplasmic OS=Homo sapiens GN=IARS PE=1 SV=2 - [SYIC_HUMAN] | | Putative helicase MOV-10 OS=Homo sapiens GN=MOV10 PE=1 SV=2 - [MOV10_HUMAN] | | ADP/ATP translocase 2 OS=Homo sapiens GN=SLC25A5 PE=1 SV=7 - [ADT2_HUMAN] | |  | |
| --- | --- | --- | --- | --- | --- | --- | --- | --- | --- | --- | --- | --- | --- | --- | --- | --- | --- | --- | --- | --- | --- | --- | --- | --- | --- | --- | --- | --- | --- | --- | --- | --- | --- | --- | --- | --- | --- | --- | --- | --- | --- | --- | --- | --- | --- | --- | --- | --- | --- | --- | --- | --- | --- | --- | --- | --- | --- | --- | --- | --- | --- | --- | --- | --- | --- | --- | --- | --- | --- | --- | --- | --- | --- | --- | --- | --- | --- | --- | --- | --- | --- | --- | --- | --- | --- | --- | --- | --- | --- | --- | --- | --- | --- | --- | --- | --- | --- | --- | --- | --- | --- | --- | --- | --- | --- | --- | --- | --- | --- | --- | --- | --- | --- | --- | --- | --- | --- | --- | --- | --- | --- | --- | --- | --- | --- | --- | --- | --- | --- | --- | --- | --- | --- | --- | --- | --- | --- | --- | --- | --- | --- | --- | --- | --- | --- | --- | --- | --- | --- | --- | --- | --- | --- | --- | --- | --- | --- | --- | --- | --- | --- | --- | --- | --- | --- | --- | --- | --- | --- | --- | --- | --- | --- | --- | --- | --- | --- | --- | --- | --- | --- | --- | --- | --- | --- | --- | --- | --- | --- | --- | --- | --- | --- | --- | --- | --- | --- | --- | --- | --- | --- | --- | --- | --- | --- | --- | --- | --- | --- | --- | --- | --- | --- | --- | --- | --- | --- | --- | --- | --- | --- | --- | --- | --- | --- | --- | --- | --- | --- | --- | --- | --- | --- | --- | --- | --- | --- | --- | --- | --- | --- | --- | --- | --- | --- | --- | --- | --- | --- | --- | --- | --- | --- | --- | --- | --- | --- | --- | --- | --- | --- | --- | --- | --- | --- | --- | --- | --- | --- | --- | --- | --- | --- | --- | --- | --- | --- | --- | --- | --- | --- | --- | --- | --- | --- | --- | --- | --- | --- | --- | --- | --- | --- | --- | --- | --- | --- | --- | --- | --- | --- | --- | --- | --- | --- | --- | --- | --- | --- | --- | --- | --- | --- | --- | --- | --- | --- | --- | --- | --- | --- | --- | --- | --- | --- | --- | --- | --- | --- | --- | --- | --- | --- | --- | --- | --- | --- | --- | --- | --- | --- | --- | --- | --- | --- | --- | --- | --- | --- | --- | --- | --- | --- | --- | --- | --- | --- | --- | --- | --- | --- | --- | --- | --- | --- | --- | --- | --- | --- | --- | --- | --- | --- | --- | --- | --- | --- | --- | --- | --- | --- | --- | --- | --- | --- | --- | --- | --- | --- | --- | --- | --- | --- | --- | --- | --- | --- | --- | --- | --- | --- | --- | --- | --- | --- | --- | --- | --- | --- | --- | --- | --- | --- | --- | --- | --- | --- | --- | --- | --- | --- | --- | --- | --- | --- | --- | --- | --- | --- | --- | --- | --- | --- | --- | --- | --- | --- | --- | --- | --- | --- | --- | --- | --- | --- | --- | --- | --- | --- | --- | --- | --- | --- | --- | --- | --- | --- | --- | --- | --- | --- | --- | --- | --- | --- | --- | --- | --- | --- | --- | --- | --- | --- | --- | --- | --- | --- | --- | --- | --- | --- | --- | --- | --- | --- | --- | --- | --- | --- | --- | --- | --- | --- | --- | --- | --- | --- | --- | --- | --- | --- | --- | --- | --- | --- | --- | --- | --- | --- | --- | --- | --- | --- | --- | --- | --- | --- | --- | --- | --- | --- | --- | --- | --- | --- | --- | --- | --- | --- | --- | --- | --- | --- | --- | --- | --- | --- | --- | --- | --- | --- | --- | --- | --- | --- | --- | --- | --- | --- | --- | --- | --- | --- | --- | --- | --- | --- | --- | --- | --- | --- | --- | --- | --- | --- | --- | --- | --- | --- | --- | --- | --- | --- | --- | --- | --- | --- | --- | --- | --- | --- | --- | --- | --- | --- | --- | --- | --- | --- | --- | --- | --- | --- | --- | --- | --- | --- | --- | --- | --- | --- | --- | --- | --- | --- | --- | --- | --- | --- | --- | --- | --- | --- | --- | --- | --- | --- | --- | --- | --- | --- | --- | --- | --- | --- | --- | --- | --- | --- | --- | --- | --- | --- | --- | --- | --- | --- | --- | --- | --- | --- | --- | --- | --- | --- | --- | --- | --- | --- | --- | --- | --- | --- | --- | --- | --- | --- | --- | --- | --- | --- | --- | --- | --- | --- | --- | --- | --- | --- | --- | --- | --- | --- | --- | --- | --- | --- | --- | --- | --- | --- | --- | --- | --- | --- | --- | --- | --- | --- | --- | --- | --- | --- | --- | --- | --- | --- | --- | --- | --- | --- | --- | --- | --- | --- | --- | --- | --- | --- | --- | --- | --- | --- | --- | --- | --- | --- | --- | --- | --- | --- | --- | --- | --- | --- | --- | --- | --- | --- | --- | --- | --- | --- | --- | --- | --- | --- | --- | --- | --- | --- | --- | --- | --- | --- | --- | --- | --- | --- | --- | --- | --- | --- | --- | --- | --- | --- | --- | --- | --- | --- | --- | --- | --- | --- | --- | --- | --- | --- | --- | --- | --- | --- | --- | --- | --- | --- | --- | --- | --- | --- | --- | --- | --- | --- | --- | --- | --- | --- | --- | --- | --- | --- | --- | --- | --- | --- | --- | --- | --- | --- | --- | --- | --- | --- | --- | --- | --- | --- | --- | --- | --- | --- | --- | --- | --- | --- | --- | --- | --- | --- | --- | --- | --- | --- | --- | --- | --- | --- | --- | --- | --- | --- | --- | --- | --- | --- | --- | --- | --- | --- | --- | --- | --- | --- | --- | --- | --- | --- | --- | --- | --- | --- | --- | --- | --- | --- | --- | --- | --- | --- | --- | --- | --- | --- | --- | --- | --- | --- | --- | --- | --- | --- | --- | --- | --- | --- | --- | --- | --- | --- | --- | --- | --- | --- | --- | --- | --- | --- | --- | --- | --- | --- | --- | --- | --- | --- | --- | --- | --- | --- | --- | --- | --- | --- | --- | --- | --- | --- | --- | --- | --- | --- | --- | --- | --- | --- | --- | --- | --- | --- | --- | --- | --- | --- | --- | --- | --- | --- | --- | --- | --- | --- | --- | --- | --- | --- | --- | --- | --- | --- | --- | --- | --- | --- | --- | --- | --- | --- | --- | --- | --- | --- | --- | --- | --- | --- | --- | --- | --- | --- | --- | --- | --- | --- | --- | --- | --- | --- | --- | --- | --- | --- | --- | --- | --- | --- | --- | --- | --- | --- | --- | --- | --- | --- | --- | --- | --- | --- | --- | --- | --- | --- | --- | --- | --- | --- | --- | --- | --- | --- | --- | --- | --- | --- | --- | --- | --- | --- | --- | --- | --- | --- | --- | --- | --- | --- | --- | --- | --- | --- | --- | --- | --- | --- | --- | --- | --- | --- | --- | --- | --- | --- | --- | --- | --- | --- | --- | --- | --- | --- | --- | --- | --- | --- | --- | --- | --- | --- | --- | --- | --- | --- | --- | --- | --- | --- | --- | --- | --- | --- | --- | --- | --- | --- | --- | --- | --- | --- | --- | --- | --- | --- | --- | --- | --- | --- | --- | --- | --- | --- | --- | --- | --- | --- | --- | --- | --- | --- | --- | --- | --- | --- | --- | --- | --- | --- | --- | --- | --- | --- | --- | --- | --- | --- | --- | --- | --- | --- | --- | --- | --- | --- | --- | --- | --- | --- | --- | --- | --- | --- | --- | --- | --- | --- | --- | --- | --- | --- | --- | --- | --- | --- | --- | --- | --- | --- | --- | --- | --- | --- | --- |

**Sample C1:**

| | Accession | | --- | | O95071 | | P09874 | | P42285 | | Q15029 | | Q9P0K7 | | O00159 | | Q99613 | | Q9Y2A7 | | P78347 | | P58107 | | Q14152 | | Q15149 | | Q9BPX3 | | P22314 | | P15924 | | Q15393 | | Q6P1N0 | | O43795 | | Q9H9Y6 | | P53396 | | Q92974 | | O95373 | | Q86XP3 | | Q86YS7 | | Q7KZF4 | | Q14527 | | Q99575 | | Q16531 | | Q9Y5B6 | | P33176 | | P51530 | | Q9H0A0 | | A6QL63 | | Q8TF46 | | Q9BXP5 | | Q86XI2 | | Q8IWX8 | | O00410 | | Q86W56 | | O00203 | | P12270 | | P08670 | | Q9Y4E8 | | O75122 | | Q9NX05 | | O75400 | | P51610 | | Q92900 | | P38935 | | P98175 | | Q05397 | | Q00839 | | P52701 | | Q8IUD2 | | Q16513 | | Q8N163 | | Q9UPP1 | | Q8WVB6 | | P55884 | | Q8N5C6 | | Q9NZC9 | | Q13813 | | O60231 | | P35580 | | O15042 | | Q96QC0 | | Q8IWC1 | | Q9HCE1 | | Q9H2U1 | | Q9Y2L1 | | Q02241 | | Q8N9B5 | | Q5H9R7 | | Q12768 | | Q8IVF7 | | O94972 | | Q96DT7 | | Q6PKG0 | | Q08211 | | Q9HBG6 | | Q7Z2W4 | | Q3KQU3 | | O00267 | | Q96P70 | | O94762 | | Q8WUM0 | | P49756 | | Q7L2E3 | | P53992 | | Q9BZH6 | | P49736 | | Q9C0B7 | | Q8NE71 | | O94832 | | O60518 | | O75694 | | Q9BSJ8 | | Q69YQ0 | | Q15020 | | Q96RT8 | | Q9NQW6 | | Q93100 | | Q9NZB2 | | Q9BTW9 | | Q8N960 | | O75044 | | O94906 | | Q96KR1 | | P43243 | | Q86W92 | | Q7Z6B7 | |  | | | Coverage | | --- | | 19.65 | | 18.05 | | 20.15 | | 32.30 | | 19.69 | | 20.88 | | 12.60 | | 24.20 | | 13.93 | | 19.41 | | 10.13 | | 4.78 | | 13.60 | | 14.37 | | 5.96 | | 12.41 | | 16.19 | | 11.71 | | 10.13 | | 9.81 | | 10.34 | | 6.07 | | 11.41 | | 9.90 | | 6.48 | | 5.55 | | 10.35 | | 16.05 | | 11.56 | | 8.10 | | 6.60 | | 6.63 | | 4.80 | | 7.50 | | 9.02 | | 6.91 | | 7.21 | | 8.75 | | 6.25 | | 8.68 | | 2.75 | | 11.16 | | 5.20 | | 4.33 | | 5.20 | | 5.12 | | 1.18 | | 5.31 | | 5.74 | | 6.77 | | 6.18 | | 3.27 | | 6.62 | | 2.69 | | 11.48 | | 6.50 | | 2.55 | | 7.18 | | 4.30 | | 5.23 | | 4.40 | | 1.54 | | 7.01 | | 1.52 | | 2.53 | | 6.17 | | 3.08 | | 1.99 | | 5.06 | | 2.40 | | 4.48 | | 4.96 | | 5.96 | | 3.45 | | 3.31 | | 3.42 | | 4.59 | | 3.56 | | 3.23 | | 3.71 | | 3.22 | | 2.97 | | 4.78 | | 3.46 | | 4.74 | | 3.55 | | 3.68 | | 1.59 | | 4.66 | | 3.10 | | 3.98 | | 2.56 | | 2.72 | | 5.27 | | 3.53 | | 1.51 | | 2.17 | | 1.88 | | 2.18 | | 1.86 | | 2.67 | | 3.39 | | 2.24 | | 1.93 | | 2.13 | | 1.77 | | 3.08 | | 3.35 | | 8.26 | | 3.56 | | 1.75 | |  | | | # PSMs | | --- | | 118 | | 43 | | 50 | | 49 | | 32 | | 40 | | 30 | | 39 | | 26 | | 32 | | 18 | | 32 | | 21 | | 24 | | 29 | | 24 | | 23 | | 18 | | 16 | | 16 | | 16 | | 13 | | 14 | | 17 | | 11 | | 8 | | 13 | | 20 | | 17 | | 14 | | 12 | | 10 | | 8 | | 15 | | 12 | | 10 | | 13 | | 11 | | 10 | | 11 | | 11 | | 7 | | 8 | | 8 | | 7 | | 5 | | 5 | | 9 | | 10 | | 9 | | 11 | | 4 | | 14 | | 6 | | 13 | | 9 | | 4 | | 8 | | 5 | | 9 | | 6 | | 4 | | 9 | | 4 | | 4 | | 5 | | 3 | | 5 | | 7 | | 6 | | 4 | | 4 | | 7 | | 6 | | 5 | | 3 | | 4 | | 5 | | 7 | | 6 | | 3 | | 3 | | 6 | | 5 | | 5 | | 5 | | 5 | | 3 | | 4 | | 6 | | 5 | | 5 | | 3 | | 8 | | 8 | | 3 | | 4 | | 4 | | 3 | | 3 | | 3 | | 5 | | 2 | | 2 | | 2 | | 4 | | 4 | | 3 | | 5 | | 3 | | 2 | |  | | | # Peptides | | --- | | 39 | | 12 | | 16 | | 24 | | 15 | | 16 | | 11 | | 20 | | 11 | | 13 | | 11 | | 19 | | 10 | | 10 | | 14 | | 11 | | 11 | | 11 | | 9 | | 8 | | 8 | | 5 | | 8 | | 8 | | 5 | | 4 | | 8 | | 13 | | 8 | | 7 | | 6 | | 5 | | 5 | | 7 | | 6 | | 7 | | 6 | | 7 | | 5 | | 8 | | 6 | | 4 | | 4 | | 4 | | 4 | | 3 | | 2 | | 5 | | 5 | | 5 | | 6 | | 2 | | 8 | | 3 | | 9 | | 5 | | 2 | | 4 | | 3 | | 5 | | 4 | | 3 | | 6 | | 2 | | 2 | | 4 | | 2 | | 2 | | 4 | | 2 | | 3 | | 3 | | 4 | | 3 | | 3 | | 2 | | 3 | | 3 | | 4 | | 4 | | 2 | | 2 | | 4 | | 3 | | 3 | | 3 | | 3 | | 2 | | 3 | | 3 | | 3 | | 2 | | 2 | | 5 | | 3 | | 2 | | 2 | | 2 | | 2 | | 2 | | 2 | | 3 | | 2 | | 2 | | 2 | | 2 | | 3 | | 2 | | 4 | | 3 | | 2 | |  | | | # AAs | | --- | | 2799 | | 1014 | | 1042 | | 972 | | 980 | | 1063 | | 913 | | 1128 | | 998 | | 5090 | | 1382 | | 4684 | | 1015 | | 1058 | | 2871 | | 1217 | | 951 | | 1136 | | 1135 | | 1101 | | 986 | | 1038 | | 938 | | 1000 | | 910 | | 1009 | | 1024 | | 1140 | | 917 | | 963 | | 1060 | | 1025 | | 1104 | | 1054 | | 876 | | 1143 | | 916 | | 1097 | | 976 | | 1094 | | 2363 | | 466 | | 981 | | 1294 | | 1096 | | 957 | | 2035 | | 1129 | | 993 | | 930 | | 1052 | | 825 | | 1360 | | 1116 | | 984 | | 923 | | 1060 | | 975 | | 814 | | 995 | | 954 | | 2472 | | 1041 | | 1976 | | 1029 | | 940 | | 876 | | 1003 | | 1008 | | 958 | | 960 | | 988 | | 873 | | 1159 | | 1028 | | 964 | | 871 | | 1096 | | 1270 | | 1241 | | 902 | | 841 | | 1087 | | 1041 | | 991 | | 1156 | | 843 | | 1194 | | 1094 | | 1224 | | 904 | | 1094 | | 845 | | 1006 | | 1105 | | 1391 | | 1104 | | 1117 | | 963 | | 1024 | | 1124 | | 1093 | | 1118 | | 1192 | | 986 | | 1071 | | 941 | | 1074 | | 847 | | 1011 | | 1085 | |  | | | MW [kDa] | | --- | | 309.2 | | 113.0 | | 117.7 | | 109.4 | | 110.0 | | 121.6 | | 105.3 | | 128.7 | | 112.3 | | 555.3 | | 166.5 | | 531.5 | | 114.3 | | 117.8 | | 331.6 | | 135.5 | | 104.0 | | 131.9 | | 128.1 | | 120.8 | | 111.5 | | 119.4 | | 102.9 | | 110.4 | | 101.9 | | 113.9 | | 114.6 | | 126.9 | | 104.7 | | 109.6 | | 120.3 | | 115.7 | | 120.8 | | 120.7 | | 100.6 | | 130.9 | | 103.6 | | 123.5 | | 111.0 | | 121.2 | | 267.1 | | 53.6 | | 112.3 | | 141.0 | | 120.5 | | 108.7 | | 208.6 | | 124.3 | | 109.1 | | 103.5 | | 119.2 | | 90.5 | | 152.7 | | 128.0 | | 112.0 | | 102.8 | | 117.8 | | 107.3 | | 92.4 | | 111.7 | | 105.9 | | 284.4 | | 119.2 | | 228.9 | | 118.2 | | 99.0 | | 98.4 | | 113.6 | | 114.7 | | 108.9 | | 110.0 | | 111.4 | | 97.6 | | 134.2 | | 117.1 | | 107.8 | | 94.8 | | 123.4 | | 140.9 | | 141.7 | | 101.4 | | 92.8 | | 120.9 | | 115.9 | | 108.8 | | 128.9 | | 100.1 | | 133.9 | | 118.2 | | 136.6 | | 101.8 | | 120.7 | | 95.9 | | 116.1 | | 124.6 | | 155.1 | | 122.8 | | 124.5 | | 109.9 | | 118.2 | | 124.1 | | 124.8 | | 121.8 | | 132.5 | | 112.6 | | 120.8 | | 106.9 | | 116.9 | | 94.6 | | 114.0 | | 124.2 | |  | | | calc. pI | | --- | | 5.85 | | 8.88 | | 6.52 | | 5.00 | | 6.21 | | 9.41 | | 5.68 | | 6.62 | | 6.39 | | 5.60 | | 6.79 | | 5.96 | | 5.59 | | 5.76 | | 6.81 | | 5.26 | | 8.09 | | 9.38 | | 7.83 | | 7.33 | | 7.27 | | 4.82 | | 7.02 | | 5.69 | | 7.17 | | 8.60 | | 9.22 | | 5.26 | | 5.68 | | 6.51 | | 7.74 | | 8.27 | | 6.83 | | 6.54 | | 5.96 | | 6.87 | | 9.04 | | 4.94 | | 6.43 | | 6.04 | | 5.02 | | 5.12 | | 5.22 | | 8.47 | | 9.03 | | 7.56 | | 7.46 | | 6.61 | | 8.97 | | 5.97 | | 6.62 | | 6.00 | | 6.90 | | 5.97 | | 6.30 | | 5.22 | | 8.72 | | 7.21 | | 5.00 | | 8.72 | | 9.06 | | 5.35 | | 6.80 | | 5.54 | | 8.47 | | 9.17 | | 9.32 | | 8.82 | | 7.68 | | 7.14 | | 8.51 | | 6.18 | | 4.60 | | 6.98 | | 6.65 | | 5.15 | | 5.16 | | 8.82 | | 6.84 | | 6.49 | | 8.40 | | 10.11 | | 5.06 | | 4.81 | | 8.56 | | 5.10 | | 6.32 | | 8.78 | | 7.06 | | 6.92 | | 5.52 | | 6.11 | | 6.80 | | 9.39 | | 5.01 | | 6.16 | | 5.83 | | 5.72 | | 5.57 | | 5.90 | | 8.07 | | 6.95 | | 8.88 | | 6.19 | | 6.25 | | 6.70 | | 8.25 | | 9.04 | | 6.25 | | 5.55 | | 6.83 | |  | | | Score | | --- | | 2027.08 | | 1059.12 | | 938.61 | | 916.35 | | 811.42 | | 759.28 | | 641.49 | | 616.60 | | 555.07 | | 540.38 | | 498.26 | | 472.40 | | 466.21 | | 462.31 | | 433.83 | | 429.99 | | 424.96 | | 408.11 | | 351.43 | | 345.91 | | 327.48 | | 315.28 | | 301.17 | | 300.11 | | 286.14 | | 285.20 | | 284.17 | | 264.27 | | 254.03 | | 240.05 | | 225.78 | | 220.39 | | 207.27 | | 206.68 | | 197.61 | | 196.35 | | 194.96 | | 192.02 | | 182.75 | | 179.27 | | 178.59 | | 175.00 | | 170.87 | | 170.20 | | 163.45 | | 162.10 | | 161.37 | | 160.49 | | 154.69 | | 153.90 | | 149.44 | | 142.73 | | 141.70 | | 141.39 | | 141.23 | | 139.40 | | 136.27 | | 126.24 | | 120.32 | | 116.56 | | 116.27 | | 115.97 | | 115.58 | | 114.74 | | 114.63 | | 113.42 | | 113.00 | | 112.96 | | 110.47 | | 105.22 | | 103.77 | | 100.38 | | 98.83 | | 97.94 | | 97.20 | | 94.11 | | 93.51 | | 92.24 | | 90.28 | | 85.86 | | 85.30 | | 83.58 | | 82.64 | | 77.54 | | 77.10 | | 76.85 | | 68.60 | | 68.45 | | 68.31 | | 64.71 | | 61.64 | | 59.62 | | 57.95 | | 57.35 | | 55.47 | | 54.89 | | 54.28 | | 53.47 | | 51.91 | | 51.30 | | 50.98 | | 47.83 | | 46.88 | | 43.28 | | 40.48 | | 40.42 | | 39.90 | | 31.68 | | 31.33 | | 30.55 | | 19.84 | |  | | | Description | | --- | | E3 ubiquitin-protein ligase UBR5 OS=Homo sapiens GN=UBR5 PE=1 SV=2 - [UBR5_HUMAN] | | Poly [ADP-ribose] polymerase 1 OS=Homo sapiens GN=PARP1 PE=1 SV=4 - [PARP1_HUMAN] | | Superkiller viralicidic activity 2-like 2 OS=Homo sapiens GN=SKIV2L2 PE=1 SV=3 - [SK2L2_HUMAN] | | 116 kDa U5 small nuclear ribonucleoprotein component OS=Homo sapiens GN=EFTUD2 PE=1 SV=1 - [U5S1_HUMAN] | | Ankycorbin OS=Homo sapiens GN=RAI14 PE=1 SV=2 - [RAI14_HUMAN] | | Unconventional myosin-Ic OS=Homo sapiens GN=MYO1C PE=1 SV=4 - [MYO1C_HUMAN] | | Eukaryotic translation initiation factor 3 subunit C OS=Homo sapiens GN=EIF3C PE=1 SV=1 - [EIF3C_HUMAN] | | Nck-associated protein 1 OS=Homo sapiens GN=NCKAP1 PE=1 SV=1 - [NCKP1_HUMAN] | | General transcription factor II-I OS=Homo sapiens GN=GTF2I PE=1 SV=2 - [GTF2I_HUMAN] | | Epiplakin OS=Homo sapiens GN=EPPK1 PE=1 SV=2 - [EPIPL_HUMAN] | | Eukaryotic translation initiation factor 3 subunit A OS=Homo sapiens GN=EIF3A PE=1 SV=1 - [EIF3A_HUMAN] | | Plectin OS=Homo sapiens GN=PLEC PE=1 SV=3 - [PLEC_HUMAN] | | Condensin complex subunit 3 OS=Homo sapiens GN=NCAPG PE=1 SV=1 - [CND3_HUMAN] | | Ubiquitin-like modifier-activating enzyme 1 OS=Homo sapiens GN=UBA1 PE=1 SV=3 - [UBA1_HUMAN] | | Desmoplakin OS=Homo sapiens GN=DSP PE=1 SV=3 - [DESP_HUMAN] | | Splicing factor 3B subunit 3 OS=Homo sapiens GN=SF3B3 PE=1 SV=4 - [SF3B3_HUMAN] | | Coiled-coil and C2 domain-containing protein 1A OS=Homo sapiens GN=CC2D1A PE=1 SV=1 - [C2D1A_HUMAN] | | Unconventional myosin-Ib OS=Homo sapiens GN=MYO1B PE=2 SV=3 - [MYO1B_HUMAN] | | DNA-directed RNA polymerase I subunit RPA2 OS=Homo sapiens GN=POLR1B PE=1 SV=2 - [RPA2_HUMAN] | | ATP-citrate synthase OS=Homo sapiens GN=ACLY PE=1 SV=3 - [ACLY_HUMAN] | | Rho guanine nucleotide exchange factor 2 OS=Homo sapiens GN=ARHGEF2 PE=1 SV=4 - [ARHG2_HUMAN] | | Importin-7 OS=Homo sapiens GN=IPO7 PE=1 SV=1 - [IPO7_HUMAN] | | ATP-dependent RNA helicase DDX42 OS=Homo sapiens GN=DDX42 PE=1 SV=1 - [DDX42_HUMAN] | | Uncharacterized protein KIAA0528 OS=Homo sapiens GN=KIAA0528 PE=1 SV=1 - [K0528_HUMAN] | | Staphylococcal nuclease domain-containing protein 1 OS=Homo sapiens GN=SND1 PE=1 SV=1 - [SND1_HUMAN] | | Helicase-like transcription factor OS=Homo sapiens GN=HLTF PE=1 SV=2 - [HLTF_HUMAN] | | Ribonucleases P/MRP protein subunit POP1 OS=Homo sapiens GN=POP1 PE=1 SV=2 - [POP1_HUMAN] | | DNA damage-binding protein 1 OS=Homo sapiens GN=DDB1 PE=1 SV=1 - [DDB1_HUMAN] | | GC-rich sequence DNA-binding factor 1 OS=Homo sapiens GN=GCFC1 PE=1 SV=2 - [GCFC1_HUMAN] | | Kinesin-1 heavy chain OS=Homo sapiens GN=KIF5B PE=1 SV=1 - [KINH_HUMAN] | | DNA2-like helicase OS=Homo sapiens GN=DNA2 PE=1 SV=3 - [DNA2L_HUMAN] | | N-acetyltransferase 10 OS=Homo sapiens GN=NAT10 PE=1 SV=2 - [NAT10_HUMAN] | | Ankyrin repeat and BTB/POZ domain-containing protein BTBD11 OS=Homo sapiens GN=BTBD11 PE=2 SV=3 - [BTBDB_HUMAN] | | DIS3-like exonuclease 1 OS=Homo sapiens GN=DIS3L PE=1 SV=2 - [DI3L1_HUMAN] | | Serrate RNA effector molecule homolog OS=Homo sapiens GN=SRRT PE=1 SV=1 - [SRRT_HUMAN] | | Condensin-2 complex subunit G2 OS=Homo sapiens GN=NCAPG2 PE=1 SV=1 - [CNDG2_HUMAN] | | Calcium homeostasis endoplasmic reticulum protein OS=Homo sapiens GN=CHERP PE=1 SV=3 - [CHERP_HUMAN] | | Importin-5 OS=Homo sapiens GN=IPO5 PE=1 SV=4 - [IPO5_HUMAN] | | Poly(ADP-ribose) glycohydrolase OS=Homo sapiens GN=PARG PE=1 SV=1 - [PARG_HUMAN] | | AP-3 complex subunit beta-1 OS=Homo sapiens GN=AP3B1 PE=1 SV=3 - [AP3B1_HUMAN] | | Nucleoprotein TPR OS=Homo sapiens GN=TPR PE=1 SV=3 - [TPR_HUMAN] | | Vimentin OS=Homo sapiens GN=VIM PE=1 SV=4 - [VIME_HUMAN] | | Ubiquitin carboxyl-terminal hydrolase 15 OS=Homo sapiens GN=USP15 PE=1 SV=3 - [UBP15_HUMAN] | | CLIP-associating protein 2 OS=Homo sapiens GN=CLASP2 PE=1 SV=2 - [CLAP2_HUMAN] | | Constitutive coactivator of PPAR-gamma-like protein 2 OS=Homo sapiens GN=FAM120C PE=2 SV=3 - [F120C_HUMAN] | | Pre-mRNA-processing factor 40 homolog A OS=Homo sapiens GN=PRPF40A PE=1 SV=2 - [PR40A_HUMAN] | | Host cell factor 1 OS=Homo sapiens GN=HCFC1 PE=1 SV=2 - [HCFC1_HUMAN] | | Regulator of nonsense transcripts 1 OS=Homo sapiens GN=UPF1 PE=1 SV=2 - [RENT1_HUMAN] | | DNA-binding protein SMUBP-2 OS=Homo sapiens GN=IGHMBP2 PE=1 SV=3 - [SMBP2_HUMAN] | | RNA-binding protein 10 OS=Homo sapiens GN=RBM10 PE=1 SV=3 - [RBM10_HUMAN] | | Focal adhesion kinase 1 OS=Homo sapiens GN=PTK2 PE=1 SV=2 - [FAK1_HUMAN] | | Heterogeneous nuclear ribonucleoprotein U OS=Homo sapiens GN=HNRNPU PE=1 SV=6 - [HNRPU_HUMAN] | | DNA mismatch repair protein Msh6 OS=Homo sapiens GN=MSH6 PE=1 SV=2 - [MSH6_HUMAN] | | ELKS/Rab6-interacting/CAST family member 1 OS=Homo sapiens GN=ERC1 PE=1 SV=1 - [RB6I2_HUMAN] | | Serine/threonine-protein kinase N2 OS=Homo sapiens GN=PKN2 PE=1 SV=1 - [PKN2_HUMAN] | | DBIRD complex subunit KIAA1967 OS=Homo sapiens GN=KIAA1967 PE=1 SV=2 - [K1967_HUMAN] | | Histone lysine demethylase PHF8 OS=Homo sapiens GN=PHF8 PE=1 SV=3 - [PHF8_HUMAN] | | Chromosome transmission fidelity protein 18 homolog OS=Homo sapiens GN=CHTF18 PE=1 SV=1 - [CTF18_HUMAN] | | Eukaryotic translation initiation factor 3 subunit B OS=Homo sapiens GN=EIF3B PE=1 SV=3 - [EIF3B_HUMAN] | | S1 RNA-binding domain-containing protein 1 OS=Homo sapiens GN=SRBD1 PE=1 SV=2 - [SRBD1_HUMAN] | | SWI/SNF-related matrix-associated actin-dependent regulator of chromatin subfamily A-like protein 1 OS=Homo sapiens GN=SMARCAL1 PE=1 SV=1 - [SMAL1_HUMAN] | | Spectrin alpha chain, brain OS=Homo sapiens GN=SPTAN1 PE=1 SV=3 - [SPTA2_HUMAN] | | Putative pre-mRNA-splicing factor ATP-dependent RNA helicase DHX16 OS=Homo sapiens GN=DHX16 PE=1 SV=2 - [DHX16_HUMAN] | | Myosin-10 OS=Homo sapiens GN=MYH10 PE=1 SV=3 - [MYH10_HUMAN] | | U2 snRNP-associated SURP motif-containing protein OS=Homo sapiens GN=U2SURP PE=1 SV=2 - [SR140_HUMAN] | | Serine/threonine-protein phosphatase 1 regulatory subunit 10 OS=Homo sapiens GN=PPP1R10 PE=1 SV=1 - [PP1RA_HUMAN] | | MAP7 domain-containing protein 3 OS=Homo sapiens GN=MAP7D3 PE=1 SV=2 - [MA7D3_HUMAN] | | Putative helicase MOV-10 OS=Homo sapiens GN=MOV10 PE=1 SV=2 - [MOV10_HUMAN] | | Probable ATP-dependent RNA helicase DHX36 OS=Homo sapiens GN=DHX36 PE=1 SV=2 - [DHX36_HUMAN] | | Exosome complex exonuclease RRP44 OS=Homo sapiens GN=DIS3 PE=1 SV=2 - [RRP44_HUMAN] | | Kinesin-like protein KIF23 OS=Homo sapiens GN=KIF23 PE=1 SV=3 - [KIF23_HUMAN] | | Junction-mediating and -regulatory protein OS=Homo sapiens GN=JMY PE=1 SV=2 - [JMY_HUMAN] | | Serine/threonine-protein phosphatase 6 regulatory subunit 3 OS=Homo sapiens GN=PPP6R3 PE=1 SV=2 - [PP6R3_HUMAN] | | WASH complex subunit strumpellin OS=Homo sapiens GN=KIAA0196 PE=1 SV=1 - [STRUM_HUMAN] | | Formin-like protein 3 OS=Homo sapiens GN=FMNL3 PE=1 SV=3 - [FMNL3_HUMAN] | | E3 ubiquitin-protein ligase TRIM37 OS=Homo sapiens GN=TRIM37 PE=1 SV=2 - [TRI37_HUMAN] | | Zinc finger and BTB domain-containing protein 10 OS=Homo sapiens GN=ZBTB10 PE=1 SV=2 - [ZBT10_HUMAN] | | La-related protein 1 OS=Homo sapiens GN=LARP1 PE=1 SV=2 - [LARP1_HUMAN] | | ATP-dependent RNA helicase A OS=Homo sapiens GN=DHX9 PE=1 SV=4 - [DHX9_HUMAN] | | Intraflagellar transport protein 122 homolog OS=Homo sapiens GN=IFT122 PE=1 SV=2 - [IF122_HUMAN] | | Zinc finger CCCH-type antiviral protein 1 OS=Homo sapiens GN=ZC3HAV1 PE=1 SV=3 - [ZCCHV_HUMAN] | | MAP7 domain-containing protein 1 OS=Homo sapiens GN=MAP7D1 PE=1 SV=1 - [MA7D1_HUMAN] | | Transcription elongation factor SPT5 OS=Homo sapiens GN=SUPT5H PE=1 SV=1 - [SPT5H_HUMAN] | | Importin-9 OS=Homo sapiens GN=IPO9 PE=1 SV=3 - [IPO9_HUMAN] | | ATP-dependent DNA helicase Q5 OS=Homo sapiens GN=RECQL5 PE=1 SV=2 - [RECQ5_HUMAN] | | Nuclear pore complex protein Nup133 OS=Homo sapiens GN=NUP133 PE=1 SV=2 - [NU133_HUMAN] | | RNA-binding protein 25 OS=Homo sapiens GN=RBM25 PE=1 SV=3 - [RBM25_HUMAN] | | Putative ATP-dependent RNA helicase DHX30 OS=Homo sapiens GN=DHX30 PE=1 SV=1 - [DHX30_HUMAN] | | Protein transport protein Sec24C OS=Homo sapiens GN=SEC24C PE=1 SV=3 - [SC24C_HUMAN] | | WD repeat-containing protein 11 OS=Homo sapiens GN=WDR11 PE=1 SV=1 - [WDR11_HUMAN] | | DNA replication licensing factor MCM2 OS=Homo sapiens GN=MCM2 PE=1 SV=4 - [MCM2_HUMAN] | | Transmembrane and coiled-coil domain-containing protein 7 OS=Homo sapiens GN=TMCO7 PE=2 SV=2 - [TMCO7_HUMAN] | | ATP-binding cassette sub-family F member 1 OS=Homo sapiens GN=ABCF1 PE=1 SV=2 - [ABCF1_HUMAN] | | Unconventional myosin-Id OS=Homo sapiens GN=MYO1D PE=1 SV=2 - [MYO1D_HUMAN] | | Ran-binding protein 6 OS=Homo sapiens GN=RANBP6 PE=1 SV=2 - [RNBP6_HUMAN] | | Nuclear pore complex protein Nup155 OS=Homo sapiens GN=NUP155 PE=1 SV=1 - [NU155_HUMAN] | | Extended synaptotagmin-1 OS=Homo sapiens GN=ESYT1 PE=1 SV=1 - [ESYT1_HUMAN] | | Cytospin-A OS=Homo sapiens GN=SPECC1L PE=1 SV=2 - [CYTSA_HUMAN] | | Squamous cell carcinoma antigen recognized by T-cells 3 OS=Homo sapiens GN=SART3 PE=1 SV=1 - [SART3_HUMAN] | | Gamma-tubulin complex component 5 OS=Homo sapiens GN=TUBGCP5 PE=1 SV=1 - [GCP5_HUMAN] | | Actin-binding protein anillin OS=Homo sapiens GN=ANLN PE=1 SV=2 - [ANLN_HUMAN] | | Phosphorylase b kinase regulatory subunit beta OS=Homo sapiens GN=PHKB PE=1 SV=3 - [KPBB_HUMAN] | | Constitutive coactivator of PPAR-gamma-like protein 1 OS=Homo sapiens GN=FAM120A PE=1 SV=2 - [F120A_HUMAN] | | Tubulin-specific chaperone D OS=Homo sapiens GN=TBCD PE=1 SV=2 - [TBCD_HUMAN] | | Centrosomal protein of 120 kDa OS=Homo sapiens GN=CEP120 PE=2 SV=2 - [CE120_HUMAN] | | SLIT-ROBO Rho GTPase-activating protein 2 OS=Homo sapiens GN=SRGAP2 PE=1 SV=2 - [FNBP2_HUMAN] | | Pre-mRNA-processing factor 6 OS=Homo sapiens GN=PRPF6 PE=1 SV=1 - [PRP6_HUMAN] | | Zinc finger RNA-binding protein OS=Homo sapiens GN=ZFR PE=1 SV=2 - [ZFR_HUMAN] | | Matrin-3 OS=Homo sapiens GN=MATR3 PE=1 SV=2 - [MATR3_HUMAN] | | Liprin-beta-1 OS=Homo sapiens GN=PPFIBP1 PE=1 SV=2 - [LIPB1_HUMAN] | | SLIT-ROBO Rho GTPase-activating protein 1 OS=Homo sapiens GN=SRGAP1 PE=1 SV=1 - [SRGP1_HUMAN] | |  | |
| --- | --- | --- | --- | --- | --- | --- | --- | --- | --- | --- | --- | --- | --- | --- | --- | --- | --- | --- | --- | --- | --- | --- | --- | --- | --- | --- | --- | --- | --- | --- | --- | --- | --- | --- | --- | --- | --- | --- | --- | --- | --- | --- | --- | --- | --- | --- | --- | --- | --- | --- | --- | --- | --- | --- | --- | --- | --- | --- | --- | --- | --- | --- | --- | --- | --- | --- | --- | --- | --- | --- | --- | --- | --- | --- | --- | --- | --- | --- | --- | --- | --- | --- | --- | --- | --- | --- | --- | --- | --- | --- | --- | --- | --- | --- | --- | --- | --- | --- | --- | --- | --- | --- | --- | --- | --- | --- | --- | --- | --- | --- | --- | --- | --- | --- | --- | --- | --- | --- | --- | --- | --- | --- | --- | --- | --- | --- | --- | --- | --- | --- | --- | --- | --- | --- | --- | --- | --- | --- | --- | --- | --- | --- | --- | --- | --- | --- | --- | --- | --- | --- | --- | --- | --- | --- | --- | --- | --- | --- | --- | --- | --- | --- | --- | --- | --- | --- | --- | --- | --- | --- | --- | --- | --- | --- | --- | --- | --- | --- | --- | --- | --- | --- | --- | --- | --- | --- | --- | --- | --- | --- | --- | --- | --- | --- | --- | --- | --- | --- | --- | --- | --- | --- | --- | --- | --- | --- | --- | --- | --- | --- | --- | --- | --- | --- | --- | --- | --- | --- | --- | --- | --- | --- | --- | --- | --- | --- | --- | --- | --- | --- | --- | --- | --- | --- | --- | --- | --- | --- | --- | --- | --- | --- | --- | --- | --- | --- | --- | --- | --- | --- | --- | --- | --- | --- | --- | --- | --- | --- | --- | --- | --- | --- | --- | --- | --- | --- | --- | --- | --- | --- | --- | --- | --- | --- | --- | --- | --- | --- | --- | --- | --- | --- | --- | --- | --- | --- | --- | --- | --- | --- | --- | --- | --- | --- | --- | --- | --- | --- | --- | --- | --- | --- | --- | --- | --- | --- | --- | --- | --- | --- | --- | --- | --- | --- | --- | --- | --- | --- | --- | --- | --- | --- | --- | --- | --- | --- | --- | --- | --- | --- | --- | --- | --- | --- | --- | --- | --- | --- | --- | --- | --- | --- | --- | --- | --- | --- | --- | --- | --- | --- | --- | --- | --- | --- | --- | --- | --- | --- | --- | --- | --- | --- | --- | --- | --- | --- | --- | --- | --- | --- | --- | --- | --- | --- | --- | --- | --- | --- | --- | --- | --- | --- | --- | --- | --- | --- | --- | --- | --- | --- | --- | --- | --- | --- | --- | --- | --- | --- | --- | --- | --- | --- | --- | --- | --- | --- | --- | --- | --- | --- | --- | --- | --- | --- | --- | --- | --- | --- | --- | --- | --- | --- | --- | --- | --- | --- | --- | --- | --- | --- | --- | --- | --- | --- | --- | --- | --- | --- | --- | --- | --- | --- | --- | --- | --- | --- | --- | --- | --- | --- | --- | --- | --- | --- | --- | --- | --- | --- | --- | --- | --- | --- | --- | --- | --- | --- | --- | --- | --- | --- | --- | --- | --- | --- | --- | --- | --- | --- | --- | --- | --- | --- | --- | --- | --- | --- | --- | --- | --- | --- | --- | --- | --- | --- | --- | --- | --- | --- | --- | --- | --- | --- | --- | --- | --- | --- | --- | --- | --- | --- | --- | --- | --- | --- | --- | --- | --- | --- | --- | --- | --- | --- | --- | --- | --- | --- | --- | --- | --- | --- | --- | --- | --- | --- | --- | --- | --- | --- | --- | --- | --- | --- | --- | --- | --- | --- | --- | --- | --- | --- | --- | --- | --- | --- | --- | --- | --- | --- | --- | --- | --- | --- | --- | --- | --- | --- | --- | --- | --- | --- | --- | --- | --- | --- | --- | --- | --- | --- | --- | --- | --- | --- | --- | --- | --- | --- | --- | --- | --- | --- | --- | --- | --- | --- | --- | --- | --- | --- | --- | --- | --- | --- | --- | --- | --- | --- | --- | --- | --- | --- | --- | --- | --- | --- | --- | --- | --- | --- | --- | --- | --- | --- | --- | --- | --- | --- | --- | --- | --- | --- | --- | --- | --- | --- | --- | --- | --- | --- | --- | --- | --- | --- | --- | --- | --- | --- | --- | --- | --- | --- | --- | --- | --- | --- | --- | --- | --- | --- | --- | --- | --- | --- | --- | --- | --- | --- | --- | --- | --- | --- | --- | --- | --- | --- | --- | --- | --- | --- | --- | --- | --- | --- | --- | --- | --- | --- | --- | --- | --- | --- | --- | --- | --- | --- | --- | --- | --- | --- | --- | --- | --- | --- | --- | --- | --- | --- | --- | --- | --- | --- | --- | --- | --- | --- | --- | --- | --- | --- | --- | --- | --- | --- | --- | --- | --- | --- | --- | --- | --- | --- | --- | --- | --- | --- | --- | --- | --- | --- | --- | --- | --- | --- | --- | --- | --- | --- | --- | --- | --- | --- | --- | --- | --- | --- | --- | --- | --- | --- | --- | --- | --- | --- | --- | --- | --- | --- | --- | --- | --- | --- | --- | --- | --- | --- | --- | --- | --- | --- | --- | --- | --- | --- | --- | --- | --- | --- | --- | --- | --- | --- | --- | --- | --- | --- | --- | --- | --- | --- | --- | --- | --- | --- | --- | --- | --- | --- | --- | --- | --- | --- | --- | --- | --- | --- | --- | --- | --- | --- | --- | --- | --- | --- | --- | --- | --- | --- | --- | --- | --- | --- | --- | --- | --- | --- | --- | --- | --- | --- | --- | --- | --- | --- | --- | --- | --- | --- | --- | --- | --- | --- | --- | --- | --- | --- | --- | --- | --- | --- | --- | --- | --- | --- | --- | --- | --- | --- | --- | --- | --- | --- | --- | --- | --- | --- | --- | --- | --- | --- | --- | --- | --- | --- | --- | --- | --- | --- | --- | --- | --- | --- | --- | --- | --- | --- | --- | --- | --- | --- | --- | --- | --- | --- | --- | --- | --- | --- | --- | --- | --- | --- | --- | --- | --- | --- | --- | --- | --- | --- | --- | --- | --- | --- | --- | --- | --- | --- | --- | --- | --- | --- | --- | --- | --- | --- | --- | --- | --- | --- | --- | --- | --- | --- | --- | --- | --- | --- | --- | --- | --- | --- | --- | --- | --- | --- | --- | --- | --- | --- | --- | --- | --- | --- | --- | --- | --- | --- | --- | --- | --- | --- | --- | --- | --- | --- | --- | --- | --- | --- | --- | --- | --- | --- | --- | --- | --- | --- | --- | --- | --- | --- | --- | --- | --- | --- | --- | --- | --- | --- | --- | --- | --- | --- | --- | --- | --- | --- | --- | --- | --- | --- | --- | --- | --- | --- | --- | --- | --- | --- | --- | --- | --- | --- | --- | --- | --- |

**Sample C2:**

| | Accession | | --- | | O95071 | | Q9BZH6 | | O43795 | | Q7L2E3 | | P28340 | | Q08211 | | P58107 | | Q92900 | | Q15149 | | Q86VP6 | | P30876 | | Q14152 | | O14974 | | Q96KR1 | | Q7L014 | | P78347 | | Q9NZB2 | | Q9P2J5 | | O00411 | | P15924 | | Q6WCQ1 | | O60264 | | Q7L576 | | Q8WUM0 | | P0CG48 | | Q96SB8 | | O60231 | | Q8IUD2 | | Q13523 | | Q15393 | | Q96F07 | | Q93009 | | P42285 | | Q9UPP1 | | Q08379 | | P09874 | | P53621 | | O15042 | | P12270 | | P52701 | | Q8N9B5 | | P28370 | | P29597 | | P20585 | | Q9H6S0 | | Q86W56 | | Q8TEW0 | | O75044 | | Q14145 | | Q9UPN4 | | Q7Z6B7 | | O15083 | | Q9UHP3 | | Q8N3U4 | | Q15424 | | Q13435 | | Q9Y6X9 | | Q9NQW6 | | Q8WVS4 | | O75533 | | Q8IVF7 | | O75150 | | Q8IY18 | | O75122 | | Q7Z460 | | Q69YQ0 | | Q9P0K7 | | Q10570 | | P51610 | | Q8IXT5 | | Q14008 | | Q86XI2 | | Q8IX01 | | Q5T8P6 | | Q504Q3 | | Q8WWM7 | | Q96Q05 | | P49792 | | Q96N67 | | Q3KQU3 | | Q9NW08 | | P23458 | | Q15020 | | Q6P1X5 | | Q6PKG0 | | Q2M389 | | Q9HAV4 | | Q14157 | | Q14562 | | O60566 | | Q99569 | | Q9BSJ8 | | O00203 | | P52732 | | Q14147 | | O95163 | | Q86T82 | | O75694 | | A6QL63 | | Q86YS7 | | Q5M775 | | Q9UM54 | | Q9C0H5 | | O75717 | | Q9H7Z3 | | Q99613 | | P53992 | | Q6ZRV2 | | P35580 | | Q9H0E3 | | O75400 | | Q6P1N0 | | Q66K74 | | O00267 | | Q01082 | | Q8TF46 | | P69849 | | P18206 | | Q86V48 | | P78527 | |  | | | Coverage | | --- | | 20.72 | | 18.22 | | 12.76 | | 18.17 | | 18.88 | | 14.96 | | 16.82 | | 15.32 | | 4.04 | | 12.20 | | 15.67 | | 10.13 | | 10.97 | | 11.64 | | 16.10 | | 9.12 | | 15.03 | | 7.23 | | 9.84 | | 5.26 | | 10.93 | | 7.22 | | 10.53 | | 14.53 | | 32.85 | | 9.90 | | 11.24 | | 8.96 | | 4.97 | | 9.45 | | 12.75 | | 15.06 | | 9.88 | | 4.34 | | 3.39 | | 4.04 | | 5.72 | | 5.93 | | 3.81 | | 6.10 | | 8.20 | | 3.32 | | 3.37 | | 3.34 | | 3.85 | | 4.20 | | 2.51 | | 4.39 | | 8.33 | | 3.23 | | 3.69 | | 4.08 | | 3.70 | | 3.98 | | 4.04 | | 6.26 | | 3.39 | | 2.67 | | 3.85 | | 3.53 | | 2.43 | | 5.00 | | 4.36 | | 3.01 | | 2.47 | | 2.78 | | 4.39 | | 2.15 | | 1.67 | | 3.30 | | 2.26 | | 2.19 | | 3.14 | | 5.56 | | 2.16 | | 2.42 | | 5.14 | | 0.81 | | 2.99 | | 2.97 | | 2.12 | | 1.99 | | 5.09 | | 1.67 | | 3.19 | | 4.26 | | 1.66 | | 3.04 | | 1.72 | | 5.14 | | 4.95 | | 3.62 | | 5.12 | | 3.60 | | 3.67 | | 1.50 | | 4.90 | | 2.80 | | 1.72 | | 2.20 | | 3.75 | | 2.01 | | 2.40 | | 1.77 | | 2.84 | | 2.74 | | 3.84 | | 3.90 | | 3.14 | | 2.00 | | 2.51 | | 4.21 | | 2.36 | | 3.04 | | 0.80 | | 1.80 | | 3.19 | | 1.76 | | 2.42 | | 0.68 | |  | | | # PSMs | | --- | | 101 | | 43 | | 38 | | 37 | | 36 | | 30 | | 35 | | 25 | | 30 | | 20 | | 24 | | 21 | | 18 | | 23 | | 27 | | 18 | | 20 | | 13 | | 15 | | 20 | | 16 | | 16 | | 19 | | 20 | | 13 | | 19 | | 15 | | 16 | | 7 | | 13 | | 20 | | 23 | | 18 | | 8 | | 7 | | 6 | | 11 | | 11 | | 13 | | 8 | | 10 | | 9 | | 7 | | 6 | | 10 | | 6 | | 6 | | 7 | | 10 | | 5 | | 7 | | 9 | | 10 | | 8 | | 5 | | 6 | | 5 | | 4 | | 6 | | 9 | | 4 | | 7 | | 7 | | 6 | | 6 | | 7 | | 7 | | 5 | | 6 | | 5 | | 6 | | 4 | | 6 | | 6 | | 5 | | 5 | | 6 | | 3 | | 8 | | 3 | | 4 | | 3 | | 5 | | 3 | | 6 | | 6 | | 4 | | 4 | | 5 | | 6 | | 9 | | 5 | | 5 | | 4 | | 5 | | 4 | | 6 | | 5 | | 3 | | 4 | | 3 | | 3 | | 3 | | 3 | | 5 | | 3 | | 4 | | 3 | | 8 | | 2 | | 2 | | 4 | | 4 | | 3 | | 2 | | 2 | | 3 | | 3 | | 2 | | 2 | |  | | | # Peptides | | --- | | 40 | | 16 | | 14 | | 18 | | 16 | | 15 | | 16 | | 14 | | 16 | | 12 | | 14 | | 11 | | 9 | | 9 | | 14 | | 8 | | 11 | | 6 | | 9 | | 13 | | 8 | | 8 | | 11 | | 12 | | 2 | | 8 | | 9 | | 9 | | 4 | | 8 | | 14 | | 12 | | 9 | | 4 | | 3 | | 3 | | 7 | | 5 | | 7 | | 7 | | 5 | | 4 | | 3 | | 3 | | 5 | | 3 | | 3 | | 4 | | 5 | | 2 | | 4 | | 4 | | 4 | | 4 | | 3 | | 4 | | 3 | | 2 | | 3 | | 4 | | 2 | | 4 | | 4 | | 3 | | 3 | | 3 | | 4 | | 3 | | 3 | | 3 | | 4 | | 2 | | 3 | | 4 | | 3 | | 2 | | 5 | | 2 | | 5 | | 2 | | 2 | | 2 | | 4 | | 2 | | 3 | | 4 | | 2 | | 2 | | 2 | | 4 | | 5 | | 3 | | 5 | | 3 | | 3 | | 2 | | 4 | | 3 | | 2 | | 2 | | 3 | | 2 | | 2 | | 2 | | 3 | | 2 | | 3 | | 3 | | 5 | | 2 | | 2 | | 3 | | 2 | | 3 | | 2 | | 2 | | 3 | | 2 | | 2 | | 2 | |  | | | # AAs | | --- | | 2799 | | 1224 | | 1136 | | 1194 | | 1107 | | 1270 | | 5090 | | 1129 | | 4684 | | 1230 | | 1174 | | 1382 | | 1030 | | 1074 | | 1031 | | 998 | | 1118 | | 1176 | | 1230 | | 2871 | | 1025 | | 1052 | | 1253 | | 1156 | | 685 | | 1091 | | 1041 | | 1116 | | 1007 | | 1217 | | 1278 | | 1102 | | 1042 | | 1060 | | 1002 | | 1014 | | 1224 | | 1029 | | 2363 | | 1360 | | 988 | | 1054 | | 1187 | | 1137 | | 1430 | | 976 | | 1356 | | 1071 | | 624 | | 1083 | | 1085 | | 957 | | 1055 | | 1231 | | 915 | | 895 | | 1032 | | 1124 | | 1066 | | 1304 | | 1028 | | 1001 | | 1101 | | 1294 | | 1538 | | 1117 | | 980 | | 1443 | | 2035 | | 1001 | | 2032 | | 1143 | | 1082 | | 1007 | | 1202 | | 1075 | | 1148 | | 3224 | | 2140 | | 841 | | 1133 | | 1154 | | 963 | | 1199 | | 1096 | | 1173 | | 1204 | | 1087 | | 1220 | | 1050 | | 1192 | | 1104 | | 1094 | | 1056 | | 1143 | | 1332 | | 979 | | 1391 | | 1104 | | 1000 | | 1068 | | 1294 | | 1083 | | 1129 | | 1164 | | 913 | | 1094 | | 1179 | | 1976 | | 1048 | | 957 | | 951 | | 1059 | | 1087 | | 2364 | | 1054 | | 1222 | | 1134 | | 1076 | | 4128 | |  | | | MW [kDa] | | --- | | 309.2 | | 136.6 | | 131.9 | | 133.9 | | 123.6 | | 140.9 | | 555.3 | | 124.3 | | 531.5 | | 136.3 | | 133.8 | | 166.5 | | 115.2 | | 116.9 | | 117.3 | | 112.3 | | 121.8 | | 134.4 | | 138.5 | | 331.6 | | 116.5 | | 121.8 | | 145.1 | | 128.9 | | 77.0 | | 126.2 | | 119.2 | | 128.0 | | 116.9 | | 135.5 | | 148.3 | | 128.2 | | 117.7 | | 117.8 | | 113.0 | | 113.0 | | 138.3 | | 118.2 | | 267.1 | | 152.7 | | 111.4 | | 122.5 | | 133.6 | | 127.3 | | 160.1 | | 111.0 | | 151.3 | | 120.8 | | 69.6 | | 122.1 | | 124.2 | | 110.5 | | 122.1 | | 141.2 | | 102.6 | | 100.2 | | 117.7 | | 124.1 | | 122.5 | | 145.7 | | 117.1 | | 113.6 | | 128.7 | | 141.0 | | 169.3 | | 124.5 | | 110.0 | | 160.8 | | 208.6 | | 118.0 | | 225.4 | | 130.9 | | 120.1 | | 113.5 | | 135.3 | | 113.3 | | 128.4 | | 358.0 | | 242.4 | | 92.8 | | 127.7 | | 133.2 | | 109.9 | | 136.9 | | 123.4 | | 136.3 | | 136.2 | | 114.5 | | 139.2 | | 119.5 | | 131.8 | | 122.8 | | 121.2 | | 119.1 | | 128.0 | | 150.2 | | 110.1 | | 155.1 | | 120.8 | | 110.4 | | 118.5 | | 149.6 | | 121.2 | | 125.9 | | 132.6 | | 105.3 | | 118.2 | | 127.0 | | 228.9 | | 110.3 | | 108.7 | | 104.0 | | 112.1 | | 120.9 | | 274.4 | | 120.7 | | 134.0 | | 123.7 | | 120.2 | | 468.8 | |  | | | calc. pI | | --- | | 5.85 | | 6.92 | | 9.38 | | 8.78 | | 7.03 | | 6.84 | | 5.60 | | 6.61 | | 5.96 | | 5.78 | | 6.87 | | 6.79 | | 5.40 | | 9.04 | | 9.29 | | 6.39 | | 8.88 | | 7.30 | | 8.98 | | 6.81 | | 6.21 | | 8.09 | | 6.90 | | 5.10 | | 7.66 | | 6.99 | | 6.80 | | 5.97 | | 10.26 | | 5.26 | | 7.31 | | 5.55 | | 6.52 | | 8.72 | | 5.02 | | 8.88 | | 7.66 | | 8.47 | | 5.02 | | 6.90 | | 6.18 | | 8.09 | | 7.15 | | 8.02 | | 8.40 | | 6.43 | | 7.68 | | 6.70 | | 6.44 | | 8.69 | | 6.83 | | 6.99 | | 5.34 | | 5.43 | | 5.47 | | 5.67 | | 8.38 | | 8.07 | | 7.31 | | 7.09 | | 6.65 | | 6.23 | | 8.38 | | 8.47 | | 9.03 | | 5.72 | | 6.21 | | 6.40 | | 7.46 | | 6.81 | | 7.80 | | 6.87 | | 7.28 | | 9.16 | | 5.99 | | 8.59 | | 6.62 | | 6.20 | | 6.80 | | 10.11 | | 8.50 | | 7.55 | | 5.57 | | 8.19 | | 8.82 | | 7.44 | | 5.80 | | 7.11 | | 8.32 | | 5.27 | | 8.94 | | 5.83 | | 6.04 | | 5.64 | | 7.56 | | 5.94 | | 6.20 | | 6.16 | | 6.83 | | 5.69 | | 6.70 | | 8.53 | | 7.50 | | 5.62 | | 7.68 | | 5.68 | | 7.06 | | 6.98 | | 5.54 | | 9.83 | | 7.56 | | 8.09 | | 7.30 | | 5.06 | | 5.57 | | 6.54 | | 5.67 | | 5.66 | | 8.50 | | 7.12 | |  | | | Score | | --- | | 1698.48 | | 947.28 | | 686.71 | | 653.06 | | 652.65 | | 562.07 | | 539.56 | | 502.59 | | 478.68 | | 434.79 | | 409.98 | | 406.75 | | 396.09 | | 392.08 | | 378.22 | | 357.77 | | 356.83 | | 339.05 | | 328.54 | | 319.13 | | 302.19 | | 285.51 | | 282.59 | | 281.90 | | 277.10 | | 273.74 | | 268.22 | | 254.16 | | 253.02 | | 252.46 | | 242.35 | | 239.05 | | 231.48 | | 215.00 | | 208.76 | | 186.85 | | 182.94 | | 178.42 | | 164.20 | | 164.13 | | 163.81 | | 162.56 | | 158.86 | | 155.84 | | 154.56 | | 152.21 | | 150.68 | | 149.57 | | 148.36 | | 147.18 | | 142.27 | | 129.63 | | 129.18 | | 129.12 | | 122.23 | | 121.77 | | 120.16 | | 118.99 | | 117.90 | | 117.02 | | 115.99 | | 115.04 | | 109.54 | | 108.96 | | 108.80 | | 106.80 | | 106.69 | | 106.33 | | 99.76 | | 98.06 | | 97.27 | | 96.02 | | 95.30 | | 92.90 | | 92.07 | | 90.13 | | 86.81 | | 86.06 | | 84.97 | | 84.46 | | 83.14 | | 82.27 | | 80.58 | | 79.57 | | 78.28 | | 76.01 | | 75.97 | | 74.86 | | 72.72 | | 72.27 | | 70.36 | | 68.70 | | 66.86 | | 66.73 | | 66.58 | | 65.59 | | 65.02 | | 63.74 | | 63.02 | | 62.60 | | 55.93 | | 54.54 | | 53.34 | | 53.32 | | 50.49 | | 48.74 | | 47.83 | | 44.61 | | 43.31 | | 41.52 | | 41.36 | | 39.44 | | 39.38 | | 34.22 | | 32.52 | | 31.97 | | 27.25 | | 22.60 | | 21.40 | | 20.60 | |  | | | Description | | --- | | E3 ubiquitin-protein ligase UBR5 OS=Homo sapiens GN=UBR5 PE=1 SV=2 - [UBR5_HUMAN] | | WD repeat-containing protein 11 OS=Homo sapiens GN=WDR11 PE=1 SV=1 - [WDR11_HUMAN] | | Unconventional myosin-Ib OS=Homo sapiens GN=MYO1B PE=2 SV=3 - [MYO1B_HUMAN] | | Putative ATP-dependent RNA helicase DHX30 OS=Homo sapiens GN=DHX30 PE=1 SV=1 - [DHX30_HUMAN] | | DNA polymerase delta catalytic subunit OS=Homo sapiens GN=POLD1 PE=1 SV=2 - [DPOD1_HUMAN] | | ATP-dependent RNA helicase A OS=Homo sapiens GN=DHX9 PE=1 SV=4 - [DHX9_HUMAN] | | Epiplakin OS=Homo sapiens GN=EPPK1 PE=1 SV=2 - [EPIPL_HUMAN] | | Regulator of nonsense transcripts 1 OS=Homo sapiens GN=UPF1 PE=1 SV=2 - [RENT1_HUMAN] | | Plectin OS=Homo sapiens GN=PLEC PE=1 SV=3 - [PLEC_HUMAN] | | Cullin-associated NEDD8-dissociated protein 1 OS=Homo sapiens GN=CAND1 PE=1 SV=2 - [CAND1_HUMAN] | | DNA-directed RNA polymerase II subunit RPB2 OS=Homo sapiens GN=POLR2B PE=1 SV=1 - [RPB2_HUMAN] | | Eukaryotic translation initiation factor 3 subunit A OS=Homo sapiens GN=EIF3A PE=1 SV=1 - [EIF3A_HUMAN] | | Protein phosphatase 1 regulatory subunit 12A OS=Homo sapiens GN=PPP1R12A PE=1 SV=1 - [MYPT1_HUMAN] | | Zinc finger RNA-binding protein OS=Homo sapiens GN=ZFR PE=1 SV=2 - [ZFR_HUMAN] | | Probable ATP-dependent RNA helicase DDX46 OS=Homo sapiens GN=DDX46 PE=1 SV=2 - [DDX46_HUMAN] | | General transcription factor II-I OS=Homo sapiens GN=GTF2I PE=1 SV=2 - [GTF2I_HUMAN] | | Constitutive coactivator of PPAR-gamma-like protein 1 OS=Homo sapiens GN=FAM120A PE=1 SV=2 - [F120A_HUMAN] | | Leucine--tRNA ligase, cytoplasmic OS=Homo sapiens GN=LARS PE=1 SV=2 - [SYLC_HUMAN] | | DNA-directed RNA polymerase, mitochondrial OS=Homo sapiens GN=POLRMT PE=1 SV=2 - [RPOM_HUMAN] | | Desmoplakin OS=Homo sapiens GN=DSP PE=1 SV=3 - [DESP_HUMAN] | | Myosin phosphatase Rho-interacting protein OS=Homo sapiens GN=MPRIP PE=1 SV=3 - [MPRIP_HUMAN] | | SWI/SNF-related matrix-associated actin-dependent regulator of chromatin subfamily A member 5 OS=Homo sapiens GN=SMARCA5 PE=1 SV=1 - [SMCA5_HUMAN] | | Cytoplasmic FMR1-interacting protein 1 OS=Homo sapiens GN=CYFIP1 PE=1 SV=1 - [CYFP1_HUMAN] | | Nuclear pore complex protein Nup133 OS=Homo sapiens GN=NUP133 PE=1 SV=2 - [NU133_HUMAN] | | Polyubiquitin-C OS=Homo sapiens GN=UBC PE=1 SV=3 - [UBC_HUMAN] | | Structural maintenance of chromosomes protein 6 OS=Homo sapiens GN=SMC6 PE=1 SV=2 - [SMC6_HUMAN] | | Putative pre-mRNA-splicing factor ATP-dependent RNA helicase DHX16 OS=Homo sapiens GN=DHX16 PE=1 SV=2 - [DHX16_HUMAN] | | ELKS/Rab6-interacting/CAST family member 1 OS=Homo sapiens GN=ERC1 PE=1 SV=1 - [RB6I2_HUMAN] | | Serine/threonine-protein kinase PRP4 homolog OS=Homo sapiens GN=PRPF4B PE=1 SV=3 - [PRP4B_HUMAN] | | Splicing factor 3B subunit 3 OS=Homo sapiens GN=SF3B3 PE=1 SV=4 - [SF3B3_HUMAN] | | Cytoplasmic FMR1-interacting protein 2 OS=Homo sapiens GN=CYFIP2 PE=1 SV=2 - [CYFP2_HUMAN] | | Ubiquitin carboxyl-terminal hydrolase 7 OS=Homo sapiens GN=USP7 PE=1 SV=2 - [UBP7_HUMAN] | | Superkiller viralicidic activity 2-like 2 OS=Homo sapiens GN=SKIV2L2 PE=1 SV=3 - [SK2L2_HUMAN] | | Histone lysine demethylase PHF8 OS=Homo sapiens GN=PHF8 PE=1 SV=3 - [PHF8_HUMAN] | | Golgin subfamily A member 2 OS=Homo sapiens GN=GOLGA2 PE=1 SV=3 - [GOGA2_HUMAN] | | Poly [ADP-ribose] polymerase 1 OS=Homo sapiens GN=PARP1 PE=1 SV=4 - [PARP1_HUMAN] | | Coatomer subunit alpha OS=Homo sapiens GN=COPA PE=1 SV=2 - [COPA_HUMAN] | | U2 snRNP-associated SURP motif-containing protein OS=Homo sapiens GN=U2SURP PE=1 SV=2 - [SR140_HUMAN] | | Nucleoprotein TPR OS=Homo sapiens GN=TPR PE=1 SV=3 - [TPR_HUMAN] | | DNA mismatch repair protein Msh6 OS=Homo sapiens GN=MSH6 PE=1 SV=2 - [MSH6_HUMAN] | | Junction-mediating and -regulatory protein OS=Homo sapiens GN=JMY PE=1 SV=2 - [JMY_HUMAN] | | Probable global transcription activator SNF2L1 OS=Homo sapiens GN=SMARCA1 PE=1 SV=2 - [SMCA1_HUMAN] | | Non-receptor tyrosine-protein kinase TYK2 OS=Homo sapiens GN=TYK2 PE=1 SV=3 - [TYK2_HUMAN] | | DNA mismatch repair protein Msh3 OS=Homo sapiens GN=MSH3 PE=1 SV=4 - [MSH3_HUMAN] | | Probable ATP-dependent RNA helicase YTHDC2 OS=Homo sapiens GN=YTHDC2 PE=1 SV=2 - [YTDC2_HUMAN] | | Poly(ADP-ribose) glycohydrolase OS=Homo sapiens GN=PARG PE=1 SV=1 - [PARG_HUMAN] | | Partitioning defective 3 homolog OS=Homo sapiens GN=PARD3 PE=1 SV=2 - [PARD3_HUMAN] | | SLIT-ROBO Rho GTPase-activating protein 2 OS=Homo sapiens GN=SRGAP2 PE=1 SV=2 - [FNBP2_HUMAN] | | Kelch-like ECH-associated protein 1 OS=Homo sapiens GN=KEAP1 PE=1 SV=2 - [KEAP1_HUMAN] | | 5-azacytidine-induced protein 1 OS=Homo sapiens GN=AZI1 PE=1 SV=3 - [AZI1_HUMAN] | | SLIT-ROBO Rho GTPase-activating protein 1 OS=Homo sapiens GN=SRGAP1 PE=1 SV=1 - [SRGP1_HUMAN] | | ERC protein 2 OS=Homo sapiens GN=ERC2 PE=1 SV=3 - [ERC2_HUMAN] | | Ubiquitin carboxyl-terminal hydrolase 25 OS=Homo sapiens GN=USP25 PE=1 SV=4 - [UBP25_HUMAN] | | Cohesin subunit SA-2 OS=Homo sapiens GN=STAG2 PE=1 SV=3 - [STAG2_HUMAN] | | Scaffold attachment factor B1 OS=Homo sapiens GN=SAFB PE=1 SV=4 - [SAFB1_HUMAN] | | Splicing factor 3B subunit 2 OS=Homo sapiens GN=SF3B2 PE=1 SV=2 - [SF3B2_HUMAN] | | MORC family CW-type zinc finger protein 2 OS=Homo sapiens GN=MORC2 PE=1 SV=2 - [MORC2_HUMAN] | | Actin-binding protein anillin OS=Homo sapiens GN=ANLN PE=1 SV=2 - [ANLN_HUMAN] | | WD repeat-containing protein 60 OS=Homo sapiens GN=WDR60 PE=1 SV=3 - [WDR60_HUMAN] | | Splicing factor 3B subunit 1 OS=Homo sapiens GN=SF3B1 PE=1 SV=3 - [SF3B1_HUMAN] | | Formin-like protein 3 OS=Homo sapiens GN=FMNL3 PE=1 SV=3 - [FMNL3_HUMAN] | | E3 ubiquitin-protein ligase BRE1B OS=Homo sapiens GN=RNF40 PE=1 SV=4 - [BRE1B_HUMAN] | | Structural maintenance of chromosomes protein 5 OS=Homo sapiens GN=SMC5 PE=1 SV=2 - [SMC5_HUMAN] | | CLIP-associating protein 2 OS=Homo sapiens GN=CLASP2 PE=1 SV=2 - [CLAP2_HUMAN] | | CLIP-associating protein 1 OS=Homo sapiens GN=CLASP1 PE=1 SV=1 - [CLAP1_HUMAN] | | Cytospin-A OS=Homo sapiens GN=SPECC1L PE=1 SV=2 - [CYTSA_HUMAN] | | Ankycorbin OS=Homo sapiens GN=RAI14 PE=1 SV=2 - [RAI14_HUMAN] | | Cleavage and polyadenylation specificity factor subunit 1 OS=Homo sapiens GN=CPSF1 PE=1 SV=2 - [CPSF1_HUMAN] | | Host cell factor 1 OS=Homo sapiens GN=HCFC1 PE=1 SV=2 - [HCFC1_HUMAN] | | RNA-binding protein 12B OS=Homo sapiens GN=RBM12B PE=1 SV=2 - [RB12B_HUMAN] | | Cytoskeleton-associated protein 5 OS=Homo sapiens GN=CKAP5 PE=1 SV=3 - [CKAP5_HUMAN] | | Condensin-2 complex subunit G2 OS=Homo sapiens GN=NCAPG2 PE=1 SV=1 - [CNDG2_HUMAN] | | SURP and G-patch domain-containing protein 2 OS=Homo sapiens GN=SUGP2 PE=1 SV=2 - [SUGP2_HUMAN] | | RNA-binding protein 26 OS=Homo sapiens GN=RBM26 PE=1 SV=3 - [RBM26_HUMAN] | | PAB-dependent poly(A)-specific ribonuclease subunit 2 OS=Homo sapiens GN=PAN2 PE=1 SV=3 - [PAN2_HUMAN] | | Ataxin-2-like protein OS=Homo sapiens GN=ATXN2L PE=1 SV=2 - [ATX2L_HUMAN] | | Trafficking protein particle complex subunit 9 OS=Homo sapiens GN=TRAPPC9 PE=1 SV=2 - [TPPC9_HUMAN] | | E3 SUMO-protein ligase RanBP2 OS=Homo sapiens GN=RANBP2 PE=1 SV=2 - [RBP2_HUMAN] | | Dedicator of cytokinesis protein 7 OS=Homo sapiens GN=DOCK7 PE=1 SV=4 - [DOCK7_HUMAN] | | MAP7 domain-containing protein 1 OS=Homo sapiens GN=MAP7D1 PE=1 SV=1 - [MA7D1_HUMAN] | | DNA-directed RNA polymerase III subunit RPC2 OS=Homo sapiens GN=POLR3B PE=1 SV=2 - [RPC2_HUMAN] | | Tyrosine-protein kinase JAK1 OS=Homo sapiens GN=JAK1 PE=1 SV=2 - [JAK1_HUMAN] | | Squamous cell carcinoma antigen recognized by T-cells 3 OS=Homo sapiens GN=SART3 PE=1 SV=1 - [SART3_HUMAN] | | Transcription initiation factor TFIID subunit 2 OS=Homo sapiens GN=TAF2 PE=1 SV=3 - [TAF2_HUMAN] | | La-related protein 1 OS=Homo sapiens GN=LARP1 PE=1 SV=2 - [LARP1_HUMAN] | | WASH complex subunit 7 OS=Homo sapiens GN=KIAA1033 PE=1 SV=2 - [WASH7_HUMAN] | | Exportin-5 OS=Homo sapiens GN=XPO5 PE=1 SV=1 - [XPO5_HUMAN] | | Ubiquitin-associated protein 2-like OS=Homo sapiens GN=UBAP2L PE=1 SV=2 - [UBP2L_HUMAN] | | ATP-dependent RNA helicase DHX8 OS=Homo sapiens GN=DHX8 PE=1 SV=1 - [DHX8_HUMAN] | | Mitotic checkpoint serine/threonine-protein kinase BUB1 beta OS=Homo sapiens GN=BUB1B PE=1 SV=3 - [BUB1B_HUMAN] | | Plakophilin-4 OS=Homo sapiens GN=PKP4 PE=1 SV=2 - [PKP4_HUMAN] | | Extended synaptotagmin-1 OS=Homo sapiens GN=ESYT1 PE=1 SV=1 - [ESYT1_HUMAN] | | AP-3 complex subunit beta-1 OS=Homo sapiens GN=AP3B1 PE=1 SV=3 - [AP3B1_HUMAN] | | Kinesin-like protein KIF11 OS=Homo sapiens GN=KIF11 PE=1 SV=2 - [KIF11_HUMAN] | | Probable ATP-dependent RNA helicase DHX34 OS=Homo sapiens GN=DHX34 PE=2 SV=2 - [DHX34_HUMAN] | | Elongator complex protein 1 OS=Homo sapiens GN=IKBKAP PE=1 SV=3 - [ELP1_HUMAN] | | Ubiquitin carboxyl-terminal hydrolase 37 OS=Homo sapiens GN=USP37 PE=1 SV=2 - [UBP37_HUMAN] | | Nuclear pore complex protein Nup155 OS=Homo sapiens GN=NUP155 PE=1 SV=1 - [NU155_HUMAN] | | Ankyrin repeat and BTB/POZ domain-containing protein BTBD11 OS=Homo sapiens GN=BTBD11 PE=2 SV=3 - [BTBDB_HUMAN] | | Uncharacterized protein KIAA0528 OS=Homo sapiens GN=KIAA0528 PE=1 SV=1 - [K0528_HUMAN] | | Cytospin-B OS=Homo sapiens GN=SPECC1 PE=1 SV=1 - [CYTSB_HUMAN] | | Unconventional myosin-VI OS=Homo sapiens GN=MYO6 PE=1 SV=4 - [MYO6_HUMAN] | | Rho GTPase-activating protein 39 OS=Homo sapiens GN=ARHGAP39 PE=1 SV=2 - [RHG39_HUMAN] | | WD repeat and HMG-box DNA-binding protein 1 OS=Homo sapiens GN=WDHD1 PE=1 SV=1 - [WDHD1_HUMAN] | | UPF0614 protein C14orf102 OS=Homo sapiens GN=C14orf102 PE=1 SV=3 - [CN102_HUMAN] | | Eukaryotic translation initiation factor 3 subunit C OS=Homo sapiens GN=EIF3C PE=1 SV=1 - [EIF3C_HUMAN] | | Protein transport protein Sec24C OS=Homo sapiens GN=SEC24C PE=1 SV=3 - [SC24C_HUMAN] | | Protein FAM83H OS=Homo sapiens GN=FAM83H PE=1 SV=3 - [FA83H_HUMAN] | | Myosin-10 OS=Homo sapiens GN=MYH10 PE=1 SV=3 - [MYH10_HUMAN] | | Histone deacetylase complex subunit SAP130 OS=Homo sapiens GN=SAP130 PE=1 SV=1 - [SP130_HUMAN] | | Pre-mRNA-processing factor 40 homolog A OS=Homo sapiens GN=PRPF40A PE=1 SV=2 - [PR40A_HUMAN] | | Coiled-coil and C2 domain-containing protein 1A OS=Homo sapiens GN=CC2D1A PE=1 SV=1 - [C2D1A_HUMAN] | | Microtubule-associated protein 1S OS=Homo sapiens GN=MAP1S PE=1 SV=2 - [MAP1S_HUMAN] | | Transcription elongation factor SPT5 OS=Homo sapiens GN=SUPT5H PE=1 SV=1 - [SPT5H_HUMAN] | | Spectrin beta chain, brain 1 OS=Homo sapiens GN=SPTBN1 PE=1 SV=2 - [SPTB2_HUMAN] | | DIS3-like exonuclease 1 OS=Homo sapiens GN=DIS3L PE=1 SV=2 - [DI3L1_HUMAN] | | Nodal modulator 3 OS=Homo sapiens GN=NOMO3 PE=2 SV=2 - [NOMO3_HUMAN] | | Vinculin OS=Homo sapiens GN=VCL PE=1 SV=4 - [VINC_HUMAN] | | Leucine zipper protein 1 OS=Homo sapiens GN=LUZP1 PE=1 SV=2 - [LUZP1_HUMAN] | | DNA-dependent protein kinase catalytic subunit OS=Homo sapiens GN=PRKDC PE=1 SV=3 - [PRKDC_HUMAN] | |  | |
| --- | --- | --- | --- | --- | --- | --- | --- | --- | --- | --- | --- | --- | --- | --- | --- | --- | --- | --- | --- | --- | --- | --- | --- | --- | --- | --- | --- | --- | --- | --- | --- | --- | --- | --- | --- | --- | --- | --- | --- | --- | --- | --- | --- | --- | --- | --- | --- | --- | --- | --- | --- | --- | --- | --- | --- | --- | --- | --- | --- | --- | --- | --- | --- | --- | --- | --- | --- | --- | --- | --- | --- | --- | --- | --- | --- | --- | --- | --- | --- | --- | --- | --- | --- | --- | --- | --- | --- | --- | --- | --- | --- | --- | --- | --- | --- | --- | --- | --- | --- | --- | --- | --- | --- | --- | --- | --- | --- | --- | --- | --- | --- | --- | --- | --- | --- | --- | --- | --- | --- | --- | --- | --- | --- | --- | --- | --- | --- | --- | --- | --- | --- | --- | --- | --- | --- | --- | --- | --- | --- | --- | --- | --- | --- | --- | --- | --- | --- | --- | --- | --- | --- | --- | --- | --- | --- | --- | --- | --- | --- | --- | --- | --- | --- | --- | --- | --- | --- | --- | --- | --- | --- | --- | --- | --- | --- | --- | --- | --- | --- | --- | --- | --- | --- | --- | --- | --- | --- | --- | --- | --- | --- | --- | --- | --- | --- | --- | --- | --- | --- | --- | --- | --- | --- | --- | --- | --- | --- | --- | --- | --- | --- | --- | --- | --- | --- | --- | --- | --- | --- | --- | --- | --- | --- | --- | --- | --- | --- | --- | --- | --- | --- | --- | --- | --- | --- | --- | --- | --- | --- | --- | --- | --- | --- | --- | --- | --- | --- | --- | --- | --- | --- | --- | --- | --- | --- | --- | --- | --- | --- | --- | --- | --- | --- | --- | --- | --- | --- | --- | --- | --- | --- | --- | --- | --- | --- | --- | --- | --- | --- | --- | --- | --- | --- | --- | --- | --- | --- | --- | --- | --- | --- | --- | --- | --- | --- | --- | --- | --- | --- | --- | --- | --- | --- | --- | --- | --- | --- | --- | --- | --- | --- | --- | --- | --- | --- | --- | --- | --- | --- | --- | --- | --- | --- | --- | --- | --- | --- | --- | --- | --- | --- | --- | --- | --- | --- | --- | --- | --- | --- | --- | --- | --- | --- | --- | --- | --- | --- | --- | --- | --- | --- | --- | --- | --- | --- | --- | --- | --- | --- | --- | --- | --- | --- | --- | --- | --- | --- | --- | --- | --- | --- | --- | --- | --- | --- | --- | --- | --- | --- | --- | --- | --- | --- | --- | --- | --- | --- | --- | --- | --- | --- | --- | --- | --- | --- | --- | --- | --- | --- | --- | --- | --- | --- | --- | --- | --- | --- | --- | --- | --- | --- | --- | --- | --- | --- | --- | --- | --- | --- | --- | --- | --- | --- | --- | --- | --- | --- | --- | --- | --- | --- | --- | --- | --- | --- | --- | --- | --- | --- | --- | --- | --- | --- | --- | --- | --- | --- | --- | --- | --- | --- | --- | --- | --- | --- | --- | --- | --- | --- | --- | --- | --- | --- | --- | --- | --- | --- | --- | --- | --- | --- | --- | --- | --- | --- | --- | --- | --- | --- | --- | --- | --- | --- | --- | --- | --- | --- | --- | --- | --- | --- | --- | --- | --- | --- | --- | --- | --- | --- | --- | --- | --- | --- | --- | --- | --- | --- | --- | --- | --- | --- | --- | --- | --- | --- | --- | --- | --- | --- | --- | --- | --- | --- | --- | --- | --- | --- | --- | --- | --- | --- | --- | --- | --- | --- | --- | --- | --- | --- | --- | --- | --- | --- | --- | --- | --- | --- | --- | --- | --- | --- | --- | --- | --- | --- | --- | --- | --- | --- | --- | --- | --- | --- | --- | --- | --- | --- | --- | --- | --- | --- | --- | --- | --- | --- | --- | --- | --- | --- | --- | --- | --- | --- | --- | --- | --- | --- | --- | --- | --- | --- | --- | --- | --- | --- | --- | --- | --- | --- | --- | --- | --- | --- | --- | --- | --- | --- | --- | --- | --- | --- | --- | --- | --- | --- | --- | --- | --- | --- | --- | --- | --- | --- | --- | --- | --- | --- | --- | --- | --- | --- | --- | --- | --- | --- | --- | --- | --- | --- | --- | --- | --- | --- | --- | --- | --- | --- | --- | --- | --- | --- | --- | --- | --- | --- | --- | --- | --- | --- | --- | --- | --- | --- | --- | --- | --- | --- | --- | --- | --- | --- | --- | --- | --- | --- | --- | --- | --- | --- | --- | --- | --- | --- | --- | --- | --- | --- | --- | --- | --- | --- | --- | --- | --- | --- | --- | --- | --- | --- | --- | --- | --- | --- | --- | --- | --- | --- | --- | --- | --- | --- | --- | --- | --- | --- | --- | --- | --- | --- | --- | --- | --- | --- | --- | --- | --- | --- | --- | --- | --- | --- | --- | --- | --- | --- | --- | --- | --- | --- | --- | --- | --- | --- | --- | --- | --- | --- | --- | --- | --- | --- | --- | --- | --- | --- | --- | --- | --- | --- | --- | --- | --- | --- | --- | --- | --- | --- | --- | --- | --- | --- | --- | --- | --- | --- | --- | --- | --- | --- | --- | --- | --- | --- | --- | --- | --- | --- | --- | --- | --- | --- | --- | --- | --- | --- | --- | --- | --- | --- | --- | --- | --- | --- | --- | --- | --- | --- | --- | --- | --- | --- | --- | --- | --- | --- | --- | --- | --- | --- | --- | --- | --- | --- | --- | --- | --- | --- | --- | --- | --- | --- | --- | --- | --- | --- | --- | --- | --- | --- | --- | --- | --- | --- | --- | --- | --- | --- | --- | --- | --- | --- | --- | --- | --- | --- | --- | --- | --- | --- | --- | --- | --- | --- | --- | --- | --- | --- | --- | --- | --- | --- | --- | --- | --- | --- | --- | --- | --- | --- | --- | --- | --- | --- | --- | --- | --- | --- | --- | --- | --- | --- | --- | --- | --- | --- | --- | --- | --- | --- | --- | --- | --- | --- | --- | --- | --- | --- | --- | --- | --- | --- | --- | --- | --- | --- | --- | --- | --- | --- | --- | --- | --- | --- | --- | --- | --- | --- | --- | --- | --- | --- | --- | --- | --- | --- | --- | --- | --- | --- | --- | --- | --- | --- | --- | --- | --- | --- | --- | --- | --- | --- | --- | --- | --- | --- | --- | --- | --- | --- | --- | --- | --- | --- | --- | --- | --- | --- | --- | --- | --- | --- | --- | --- | --- | --- | --- | --- | --- | --- | --- | --- | --- | --- | --- | --- | --- | --- | --- | --- | --- | --- | --- | --- | --- | --- | --- | --- | --- | --- | --- | --- | --- | --- | --- | --- | --- | --- | --- | --- | --- | --- | --- | --- | --- | --- | --- | --- | --- | --- | --- | --- | --- | --- | --- | --- | --- | --- | --- | --- | --- | --- | --- | --- | --- | --- | --- | --- | --- | --- | --- | --- | --- | --- | --- | --- | --- | --- | --- | --- | --- | --- | --- | --- | --- | --- | --- | --- | --- | --- | --- | --- | --- | --- | --- | --- | --- | --- | --- | --- | --- | --- | --- | --- | --- | --- | --- | --- | --- | --- | --- | --- | --- | --- | --- | --- | --- | --- | --- | --- | --- | --- | --- | --- | --- | --- | --- | --- | --- | --- | --- | --- | --- | --- | --- | --- | --- |
